21 **Abstract**

22 Historically, frequent, low-severity fires in dry western North American forests were a  
23 major driver of ecological patterns and processes, creating resilient ecosystems dominated by  
24 widely spaced pine species. However, a century of fire-suppression has caused overcrowding,  
25 altering forest composition to shade-tolerant species, while increasing competition and leaving  
26 trees stressed and susceptible to pathogens, insects, and high-severity fire. Exacerbating the  
27 issue, fire incidence is expected to increase with changing climate, while fire season has been  
28 observed to begin earlier and last longer than historic trends. Forest thinning and prescribed fire  
29 have been identified as important management tools to mitigate these risks. Yet little is known of  
30 how thinning, fire, or their interaction affect contemporary evolutionary processes of constituent  
31 pine species that influence fitness and play an important role in the opportunity for selection and  
32 population persistence. We assessed the impact of widely used fuel reduction treatments and  
33 prescribed fire on fine-scale gene flow on an ecologically important and historically dominant  
34 shade-intolerant pine species of the Sierra Nevada, *Pinus lambertiana* Dougl. Treatment  
35 prescription (no-thin-no-fire, thin-no-fire, and fire-and-thin) was found to differentially affect both  
36 fine-scale spatial and genetic structure as well as effective gene flow in this species. Specifically,  
37 the thin-no-fire prescription increases genetic structure (spatial autocorrelation of relatives)  
38 between adults and seedlings, while seed and pollen dispersal increase and decrease,  
39 respectively, as a function of increasing disturbance intensity. While these results may be specific  
40 to the stands at our study site, they indicate how assumptions relating to genetic effects based on  
41 spatial structure can be misleading. It is likely that these disequilibrated systems will continue to  
42 evolve on unknown evolutionary trajectories. The long-term impacts of management practices on  
43 reduced fitness from inbreeding depression should be continually monitored to ensure resilience  
44 to increasingly frequent and severe fire, drought, and pest stresses.

## 45 **Introduction**

46 Many aspects of conifer biology are affected by a tree's surrounding environment as well  
47 as the density of hetero- and conspecifics. For instance, outcrossing rates of conifer species are  
48 often tied to population density (Farris & Mitton 1984) and surrounding tree heights (O'Connell *et*  
49 *al.* 2003), while removal of proximal individuals can increase pollen and gene flow distances by  
50 reducing potential mates and removing once impeding vegetation. Thus, disturbance, *sensu lato*,  
51 has the potential to alter contemporary demographic and reproductive dynamics through both  
52 direct (population-level) and indirect (ecological-level) impacts (Mouillot *et al.* 2013).

53 Historically, natural disturbances such as fire were commonplace and equilibrated many  
54 ecosystem functions and processes in forests of the western United States (Covington *et al.*  
55 1994). Fire regimes in these regions had return intervals on decadal scales (10-17 years; North  
56 *et al.* 2005), in contrast to wetter climates where fire return intervals were (sub)centennial (50+  
57 years [North *et al.* 2016]). Resultantly, these ecosystems experienced frequent, low-severity  
58 burns and were populated by fire-adapted species, creating forests dominated by resilient, widely  
59 spaced pine trees. Yet over the past 150 years, anthropogenic influence has resulted in forests  
60 that are now fire-suppressed and overgrown by shade-tolerant species, causing increased  
61 competition, leaving trees stressed and susceptible to fungal and bark beetle attacks (Bonello *et*  
62 *al.* 2006).

63 Stand densification has also increased the frequency and probability of contemporary,  
64 high-severity fires. Between 2012 and 2014 in California alone, 14,340 fires burned 1.1 million  
65 acres and injured or killed nearly 300 individuals (NIFC 2014). Collectively, fires across California,  
66 the Great Basin, Southwest, and Rocky Mountain territories have burned a combined 8.8 million  
67 acres between 2014 and 2015 (NIFC 2015), while Forest Service scientists predict future fires to  
68 reach unprecedented levels, covering over 12-15 million acres annually (USDA Forest Service  
69 2016a) requiring the United States Forest Service (USFS) to budget \$2,300,000,000 on wildfire  
70 management, suppression, and preparedness for the 2016 fiscal year (USDA Forest Service

71 2016b). Exacerbating the issue, analyses of fire season length and onset have shown that  
72 seasons are beginning earlier and lasting longer than historic trends (Westerling 2006) while  
73 climate models predict extreme weather favorable to fire to become more frequent, and ignited  
74 fires to increase in severity, size, and required suppression efforts (Miller *et al.* 2009).

75       Because of these contemporaneous trends, large-scale forest thinning projects have been  
76 implemented to simultaneously restore fire-frequent ecosystems to their pre-settlement resilience  
77 as well as to protect urban development and human life, as fuel reduction treatments have been  
78 shown to be an effective tool in decreasing fire severity and ignition probability (Agee & Skinner  
79 2005; Schwilk *et al.* 2009; Safford *et al.* 2009). For example, the Sierra Nevada Forest Plan  
80 Amendment (USDA Forest Service 2004) mandates that 50% of initial thinning treatments take  
81 place near urban populations, while the remaining thinning take place in natural wildland stands.  
82 To encourage fire resiliency the USFS has implemented fuel reduction treatments across 6.1  
83 million acres of western, fire-suppressed forestland in 2014 (USDA Forest Service 2016a).  
84 Further, forest and fire scientists are calling for an overhaul of management policy to implement  
85 these thinning treatments to a far greater extent (North *et al.* 2015). While congruent with historic  
86 forest structure, these actions will orient these already disequibrated systems on trajectories of  
87 unknown evolutionary consequence.

88       Through timber harvests, land use conversion, and fire suppression, forests have  
89 undergone systemic shifts in composition, structure, and disturbance regimes that are  
90 incongruous to the natural and evolutionary histories of endemic species (Collins *et al.* 2011;  
91 Larson & Churchill 2012). Consequentially, anthropogenic forest disturbance has been at the  
92 forefront of conservation attention for decades (Ledig 1988; 1992). The extent of human impact  
93 on forested land has received particular attention as a result of the empirical expectations  
94 developed from population genetic theory. Specifically, because of the reduction in individual tree  
95 density overall, and in particular for larger trees that asymmetrically contribute gametes to  
96 reproduction (Richardson *et al.* 2014), harvested forests are thought to be specifically subjected

97 to population bottlenecks, potentially altering existing mating systems or available gene pools  
98 while decreasing genetic variability within populations and increasing differentiation from native  
99 stands (Smouse *et al.* 2001, Cloutier *et al.* 2006; Kramer *et al.* 2008; Lowe *et al.* 2015). These  
100 consequences can influence the fitness of affected populations, as drastic changes in gene pool  
101 availability or mating system can alter a population's potential to adapt to local conditions where  
102 inbreeding depression can have deleterious effects on growth and reproductive potential (e.g.,  
103 reproductive capacity or rates of embryo abortion).

104 Past studies investigating the genetic effects of North American forest management show  
105 mixed evidence of harvest influence. These studies often sub-sample populations and primarily  
106 focus on diversity consequences across a range of molecular markers (often microsatellites).  
107 Many management studies of North American conifers compare genotypic diversity indices (e.g.,  
108  $H_E$ ,  $H_O$ , allelic richness, etc.) between treatments to detect management influence (Cheliak *et al.*  
109 1988; Gömöry 1992; Buchert *et al.* 1997; Adams *et al.* 1998; Rajora *et al.* 2000; Macdonald *et al.*  
110 2001; Perry & Bousquet 2001; Rajora & Pluhar 2003; El-Kassaby *et al.* 2003; Marquardt *et al.*  
111 2007; Fageria & Rajora 2013a; b). However, the same diversity values can manifest under  
112 completely different scenarios and tests of significance between population values for a small  
113 number of markers may therefore be under-informative, particularly for sub-sampled populations,  
114 as these differences can result from sampling bias or from evolutionary processes unrelated to  
115 management. Additionally, these investigations also often employ  $F_{ST}$  analyses to assess  
116 statistical significance between treated and untreated stands (Thomas *et al.* 1999; Perry &  
117 Bousquet 2001; Marquardt *et al.* 2007; Fageria & Rajora 2013a; b). Though when used in this  
118 context, this test is simply signifying whether the allelic frequencies in (sub)populations under  
119 study are likely to have been sampled from the same ancestral population (Holsinger & Weir  
120 2009). Very often, the treated and untreated stands are physically adjacent (derived of a common  
121 ancestral population) and only under extreme perturbation should significance be expected. In  
122 cases where significance is detected, and other than to assess relative diversity between stands,

123 such differentiation does little to inform how management is affecting ongoing evolutionary  
124 processes affecting fitness, as such processes may ameliorate bottlenecks due to management.  
125 It would therefore be difficult to draw such conclusions without assessing other stand and  
126 evolutionary dynamics.

127         Very seldom in North American studies of forest management are evolutionary processes  
128 influencing fitness specifically examined (but see Neale & Adams 1985). Yet when studies are  
129 done and nonsignificant findings are found, authors generally caution interpretation (Finkeldey &  
130 Ziehe 2004; Namroud *et al.* 2012). Very often the scale of sampling (both in terms of numbers  
131 and spatial extent of individuals and the degree of temporal variation), as well as the lack of  
132 investigation into evolutionary dynamics have been offered as inadequate, and that further  
133 investigation into evolutionary consequences of natural and anthropogenic disturbance could give  
134 valuable insight to forest managers and fill a vital knowledge gap in this regard (Namroud *et al.*  
135 2012). Indeed, incongruence between theoretical predictions and empirical results from studies  
136 evaluating genetic consequences of forest disturbance has created a paradox within the literature  
137 (Kramer *et al.* 2008). Yet as Lowe *et al.* (2015) point out, we may have been looking in the wrong  
138 place. They argue that instead of simply assaying mature cohorts to understand the genetic  
139 consequences of disturbance, future attention should include progeny arrays as well as the  
140 relative regenerative success across a wide range of influences. Additionally, they contend that  
141 the type and magnitude of the genetic response itself may be better understood through the  
142 variation in mating and breeding systems of studied species. Of particular importance, Lowe *et al.*  
143 *al.* (2015) advise scientists that the most fruitful research endeavors will incorporate quantitative  
144 approaches to understanding evolutionary mechanisms, specifically those connecting changes in  
145 pollination to mating systems and evolutionary fitness, and that these efforts will likely generate  
146 critical knowledge regarding the mechanisms driving the dynamics we observe.

147         Interactions between fire and forest thinning management are certain. To ensure forests  
148 are resilient to frequent fire and disturbance, and provide habitat for public recreation and native

149 wildlife, the interactive impact of management and fire must be understood in an evolutionary  
150 framework. Here, we investigated the evolutionary impact of forest management on fire-  
151 suppressed populations of the historically dominant and ecologically important sugar pine (*Pinus*  
152 *lambertiana* Dougl.) within Teakettle Experimental Forest (TEF), a USFS site located in the central  
153 Sierra Nevada of California. Using microsatellite markers, we employ parentage analysis and  
154 assess impact upon various processes known to affect fitness such as mating patterns, effective  
155 dispersal distances, and fine-scale (<300m) genetic structure. Our results show that thinning  
156 alone increases fine-scale genetic structure of constituent trees (i.e., spatial autocorrelation of  
157 relatives), and that the vast majority of pollen and seed dispersal events take place at this same  
158 scale. Although the genetic structure of adults is due to an interaction between the evolutionary  
159 history of the stand and the applied treatment, mating patterns and seedling ingrowth will  
160 determine long-term impacts of management. While effects of such treatments will vary by  
161 location, our results show that the degree of thinning and the choice of leave-trees should be  
162 tailored to a given stand, and that spatial structure (arrangement of individuals across the  
163 landscape) should not be conflated with spatial genetic structure (arrangement of relatives across  
164 the landscape). By avoiding treatments that exacerbate genetic structure, managers may be able  
165 to decrease seed abortion due to inbreeding and thus increase effective seed rain of species with  
166 management importance.

## 167 **Methods**

### 168 **Study area, sampling, and focal species**

169 Teakettle Experimental Forest (TEF) is a fire-suppressed, old-growth forest watershed in  
170 the central Sierra Nevada mountains of California. The 1300-ha forested watershed ranges from  
171 1900–2600m in elevation and consists of five conifer species representative of fire-suppressed  
172 forests of the Sierra range: white fir (*Abies concolor* [Gordon] Lindley ex Hildebrand), red fir (*A.*  
173 *magnifica* A. Murray), incense cedar (*Calocedrus decurrens* [Torr] Florin), Jeffrey pine (*Pinus*



Lind *et al.* Genetic effects of forest management

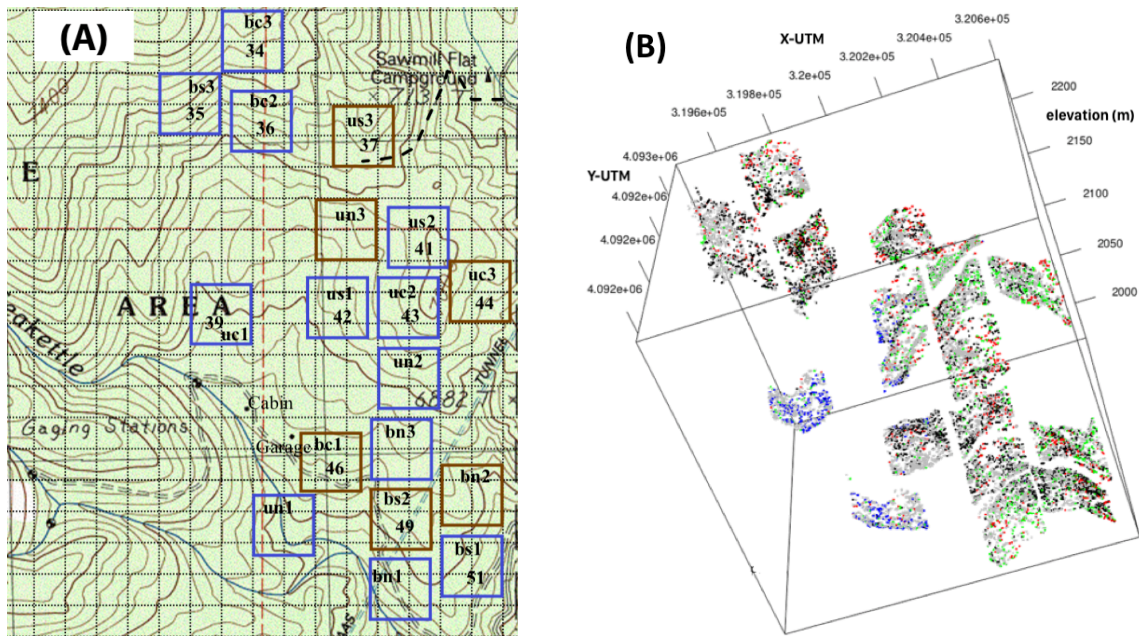

174  
175  
176 **Figure 1** Teakettle Experimental Forest, California (Latitude: 36.9606, Longitude: -119.0258). (A) Topographic map  
177 and spatial arrangement of treatments (BC = burned understory thin; BN = burned no-thin; BS = burned shelterwood  
178 thin; UC = unburned understory thin; UN = unburned no-thin; US = unburned shelterwood thin). Replicates for each  
179 treatment are numbered one through three from south to north. (B) Mapped coordinates (Universal Transverse  
180 Mercator) and elevation (meters) of pre-treatment adults  $\geq 5$ cm diameter at breast height. (green: *P. lambertiana*, red:  
181 *P. jeffreyi*, gray: *A. concolor*, blue: *A. magnifica*, orange: *C. decurrens*, black: *Quercus*, *Salix*, and remaining species.).

182  
183 *jeffreyi* Balf.), and sugar pine (*P. lambertiana*). Historically, fire burned the area every 11-17 years,  
184 but has been suppressed for 135 years (North *et al.* 2005) while logging had been completely  
185 absent within the watershed (North 2002). Six treatments were applied to neighboring 4-ha plots  
186 at TEF (each 200m x 200m, Figure 1a) by crossing two levels of burn (no-fire and fire) with three  
187 levels of thinning (no-thinning, overstory-thinning, and understory-thinning). The understory  
188 thinning prescription followed guidelines in the California spotted owl (CASPO) report (Verner *et*  
189 *al.* 1992), which is now widely used for fuel management in California (SNFPA 2004). Each  
190 treatment was replicated three times for a total of 18 plots covering 72ha. Understory-thinning  
191 removed all trees with a diameter at breast height (DBH)  $\leq 76$ cm and  $\leq 25$ cm, while overstory-  
192 thinning removes all trees  $> 25$ cm DBH except 18-22 of the largest trees per hectare. Treatments  
193 were applied to the watershed over 2000 and 2001. Plot inventories of pre-treatment (1999), and  
194 post-treatment (2001, 2004, and 2011) conditions mapped individual trees on a 3D coordinate



195 system that was then translated into Universal Transverse Mercator (colored dots, Figure 1b).  
196 Only standing boles  $\geq 5$ cm DBH were included in plot inventories, which recorded species, DBH,  
197 spatial coordinates, and decay class and forest health metrics (e.g., presence/absence of insects  
198 and pathogens). Post-treatment inventories updated DBH, decay class, forest health metrics, and  
199 added individuals to the dataset once they reached 5cm DBH. Here, seedling and saplings are  
200 all pine stems  $< 5$ cm DBH. For these, basal diameter and spatial coordinates were recorded over  
201 the summers of 2012 and 2013 by BML while collecting needle tissue samples from the full census  
202 of all live *P. lambertiana* ( $N = 3,135$ ). *Pinus lambertiana* is a historically dominant member of  
203 mixed-conifer forests of the Sierra Nevada, and continues to play important ecological roles. This  
204 species is shade-intolerant and is an important focus of restoration in the Sierra Nevada range.

#### 205 **Analysis of tree spatial structure**

206 Using plot-level *P. lambertiana* individuals, we estimated spatial structure of seedlings and  
207 adults across 10-meter distance classes,  $r$ , separately using univariate inhomogeneous pair  
208 correlation functions ( $g_{inhom}(r)$ ) from the `spatstat` library in R (Baddeley *et al.* 2015) with an  
209 isotropic edge correction. This statistic was chosen over Ripley's K, or its linearized version ( $L$ )  
210 because of advocacy for  $g_{inhom}(r)$  over these statistics (see `spatstat` manual). This analysis  
211 tests the null hypothesis that the 2D spatial arrangement of points (adults or seedlings) is not  
212 significantly different from complete spatial randomness (CSR; i.e., a Poisson distribution of inter-  
213 point distances with inhomogeneous intensities of points), where support for the alternative  
214 hypothesis is indicative of ecological factors driving spatial patterning. We calculated null  
215 confidence envelopes for each test using 199 null simulations of CSR using the same intensity of  
216 the pattern of individuals analyzed (equivalent to an alpha value of 0.01; see `spatstat` manual).  
217 For trees that coincide with the null model of CSR  $g_{inhom}(r) = 1$ , with spatial aggregation resulting  
218 in  $g_{inhom}(r) > 1$ , and with spatial inhibition resulting in  $g_{inhom}(r) < 1$  (Baddeley *et al.* 2015);  
219 significance was judged using the null confidence envelopes described above. We also repeated  
220 this analysis for shade-tolerant individuals (i.e., *A. concolor* and *A. magnifica* grouped together).

221 Further, we extended the univariate inhomogeneous pair correlation function to its bivariate  
222 equivalent,  $g_{inhom,i,j}(r)$ , to test for spatial affinity between two groups  $i$  and  $j$ , using similar  
223 methods as above for edge correction and null confidence envelopes. We calculated  $g_{inhom,i,j}(r)$   
224 between unique combinations of *P. lambertiana* adults, *P. lambertiana* seedlings, and shade-  
225 tolerant individuals. Hypothesis testing and interpretation of bivariate  $g_{inhom,i,j}(r)$  was carried out  
226 as with univariate  $g_{inhom}(r)$ . Results from these analyses will allow us to compare standing  
227 spatial structure of trees against spatial genetic autocorrelation (see below) and make inferences  
228 about the ecology of these species as well as how treatments at TEF are affecting ongoing  
229 evolutionary dynamics.

### 230 **DNA extraction, microsatellite amplification**

231 Total genomic DNA was extracted according to manufacturer's protocol using the DNeasy  
232 96 Plant Kit (Qiagen, Germantown, MD) from finely ground *P. lambertiana* samples within a  
233 subset of the factorial treatments at TEF: unburned-no-thin control plots (hereafter UN),  
234 understory-thin (CASPO) plots without burn application (hereafter UC), and burned understory-  
235 thin plots (hereafter BC) for a total of 1,348 individuals. Herein, we often refer to patterns across  
236 these treatments in terms of increasing disturbance intensity (i.e., from UN to UC to BC). For each  
237 individual, three chloroplast (paternally inherited, Wofford *et al.* 2014: pt71936, pt87268, pc10)  
238 and four nuclear (biparental inheritance, Echt *et al.* 1996: rps50, rps02, rps12, rps39)  
239 microsatellite markers were amplified (using fluorescent dyes NED, PET, VIC, and FAM) per the  
240 original publications with minor modifications using BIO-RAD iProof high fidelity DNA polymerase  
241 (see Supplemental Information). The chloroplast markers were chosen for their primer  
242 conservation across *Pinus*, *Trifoliae*, *Parrya*, and *Quinquifolia* subsections of the *Pinus* genus  
243 (Wofford *et al.* 2014) while the chosen nuclear markers have been amplified in eastern white pine  
244 (*P. strobus* L., Echt *et al.* 1996) and both sets successfully amplified on a subset of individuals at  
245 TEF as a proof-of-concept judged by gel electrophoresis. Multiplexed individuals (one fluorescent  
246 dye per well) were analyzed using the Applied Biosystems 3730xl fragment analyzer at Cornell

247 University (<http://www.biotech.cornell.edu/brc/genomics-facility>) and genotypes were called using  
248 GeneMaker v2.6.7 (see Supplemental Info; <http://www.softgenetics.com/GeneMarker.php>).

### 249 **Genetic diversity measures**

250 Treatment-specific diversity measures (total number of alleles,  $A_T$ ; mean number of alleles  
251 per locus,  $A$ ; effective number of alleles per locus,  $A_e$ ; observed and expected heterozygosity for  
252 nuclear markers, respectfully  $H_o$ ,  $H_e$ ; average number of private alleles,  $A_P$ ; and overall means for  
253 each category) were calculated for each treatment and averaged across loci in order to compare  
254 dynamics at TEF to published studies. For estimates of  $H_o$  and  $H_e$ , only nuclear markers were  
255 used. To quantify variation in these measures we also report standard deviation. We also  
256 calculated hierarchical multi-locus  $F_{ST}$  according to Weir & Cockerham (1984) for nuclear markers  
257 using the `hierfstat` package in R (Goudet & Jombart 2015) and calculated treatment-specific  
258  $F_{ST}$  in a similar manner in order to compare fixation indices across treatments. Further, single-  
259 and multi-locus exclusion probabilities for parentage analysis (see below) were calculated using  
260 python scripts modified from `gstudio` (v1.5.0; Dyer 2016).

### 261 **Analysis of spatial genetic structure**

262 To quantify spatial genetic autocorrelation at a distance class (lag)  $h$  (hereafter  $r_g^h$ ), we  
263 used multi-locus genetic distances (Smouse & Peakall 1999) and Euclidean geographic distances  
264 among spatial coordinates of individuals to calculate  $r_g^h$  across distances classes  $h$  corresponding  
265 to approximately 10-meter bins for *P. lambertiana* seedlings, *P. lambertiana* adults, as well as a  
266 bivariate approximation for the clustering of *P. lambertiana* adult genotypes to those of seedlings.  
267 For a given distance class,  $h$ , spatial patterning of multi-locus genotypes are unrelated to (i.e.,  
268 random relative to) the spatial patterns of individuals if  $r_g^h = 0$ , aggregated if  $r_g^h > 0$ , and dispersed  
269 if  $r_g^h < 0$ . We estimated null confidence intervals by taking the 2.5<sup>th</sup> and 97.5<sup>th</sup> quantiles of  $M =$   
270 1000 estimates of  $r_{g,m}^h$ , where 999 of these estimates were computed by randomly permuting  
271 individual genotypes across empirical spatial coordinates, with the  $M^{\text{th}}$  permutation being the

272 empirical estimate of  $r_g^h$  itself (Smouse & Peakall 1999). Using the `PopGenReport` package in R  
273 (Adamack & Gruber 2014) we created correlograms for nuclear and chloroplast markers both in  
274 isolation and in combination, but present only those using full genotypes as correlograms by  
275 marker type showed similar patterns as full genotypes. We used these correlograms to quantify  
276 spatial aggregation of genotypes so that conclusions based on treatment effects could be  
277 compared and contextualized with ongoing evolutionary dynamics at TEF such as that of fine-  
278 scale gene flow.

### 279 **Parentage analysis**

280 To quantify fine-scale gene flow at TEF, we conducted parentage analysis using our  
281 genetic markers and spatial coordinates of individuals. Joint estimation of parentage and dispersal  
282 parameters (i.e., mean dispersal distances of seed and pollen) were achieved by expanding  
283 methods of Moran & Clark (2011). This method simultaneously estimates parentage and dispersal  
284 kernel parameters for seed and pollen within a Bayesian framework, taking into account  
285 genotyping error and variation in individual fecundity while treating dispersal processes inside and  
286 outside of the mapped areas in a coherent manner, which is critical if the dispersal kernel is to  
287 reflect both long- and short-distance movement. Here, all sampled adults are characterized by a  
288 multi-locus genotype and a mapped coordinate. Additionally, there exists a sample of seedlings,  
289 each of which has not only a genotype and location, but an estimated pedigree as well, which can  
290 consider any adult as either mother or father, or of a selfing event (though we excluded possible  
291 selfing events from analyses). The probability of the pedigree considering two in-plot parents,  
292 before incorporating information regarding genotype, is estimated from the probability of pollen to  
293 mother movement over the given distance and of seed movement over the distance between  
294 mother and seedling, as well as the parental prior distribution for fecundity and pollen production.  
295 For the study here, pollen production was considered proportional to fecundity (as in Moran &  
296 Clark 2011) and was estimated by fitting a 2<sup>nd</sup>-order power polynomial regression to data from  
297 Figure 6 in Fowells & Schubert (1956) where Cone Count =  $0.0098(\text{dbh}^2) - 0.4811(\text{dbh}) + 10.651$ .

298 After calculating cone counts using this regression, we set fecundity for all adults <25cm DBH to  
299 zero given observed cone counts from Fowells & Schubert (1956). For dispersal priors, we set  
300 the seed dispersal kernel shape parameter,  $u_s$ , to 253.31, corresponding to a mean dispersal  
301 distance of 25m (Millar *et al.* 1992; Fowells & Schubert 1956) while the pollen dispersal kernel  
302 shape parameter prior,  $u_p$ , was set to 2279.72, corresponding to a mean pollen distance of 75m  
303 (Wright 1976; Neale 1983; Millar *et al.* 1992). For priors to the standard deviation of mean  
304 dispersal we set seed (pollen) to 1013.21 (9118.90) corresponding to standard deviations of 50m  
305 (75m).

306         Given that either parent could have produced the offspring, the likelihood that this pair is  
307 the true parents relative to all other possible parent pairs depends on the dispersal kernel priors  
308 for seed and pollen, and the seed and pollen production of all trees both inside and outside of the  
309 plot (the fraction of all possibilities; Moran & Clark 2011). To evaluate the probability of an offspring  
310 having one parent in the plot and the other outside of the plot, a set of potential out-of-plot parent-  
311 densities,  $dp_1, \dots, dp_{20}$ , each 10m progressively outside of the plot is considered (see  
312 supplemental figure S3.1 in Moran & Clark 2011). Pollen and seed movement into the plot is  
313 approximated by assuming first that all seed/pollen produced within each quarter-polygon,  $v$ ,  
314 originates from a tree located  $dp_v$  meters from the midpoint of each side outside of the plot. The  
315 expected out-of-plot pollen (seeds) reaching an in-plot mother (a seedling's location) from each  
316 quarter-polygon outside of the plot is calculated based on the average density and average  
317 fecundities of trees outside of the plot and then multiplied by the probability of dispersal to the  
318 point within the plot. Summing over each distance class over each side gives the total expected  
319 out-of-plot pollen/seed dispersal to points inside of the plot. However, to calculate the probability  
320 of an in-plot versus an out-of-plot father, the expected pollen arriving at an out-of-plot mother from  
321 another out-of-plot father must first be calculated using the concentric polygons around the  
322 sampled plot and the distance classes described above. The fraction of rings falling outside the

323 plot determines the fraction of pollen received from each distance class,  $dp_v$ , expected to come  
324 from outside trees. Once error rates ( $e_1$ ) and dropout rates ( $e_2$ ) of genotyping are calculated  
325 through regenotyping individuals (see Supplemental Information), the probability of a pedigree,  
326 seed and dispersal parameters given the offspring genotype, distances, error rates, and  
327 pollen/seed production can be estimated (Moran & Clark 2011). Very rarely have previous studies  
328 investigating effects of forest management (or using parentage analysis towards such goals)  
329 incorporated error and dropout rates into subsequent inferences.

330 For the current study, out-of-plot densities were extrapolated for each side of the nine plots  
331 used at Teakettle from densities and DBH distributions (our proxy for fecundity) revealed in pre-  
332 treatment surveys (North 2002). Due to the proximity of the treated plots, all adult trees and  
333 seedlings across UC, BC, and UN treatments were considered simultaneously for parentage  
334 assignment. Our methods therefore extend Moran & Clark (2011) from a single plot of sampled  
335 individuals to multiple plots across the landscape. Additionally, instead of considering any given  
336 pedigree as symmetrical (i.e., with no consideration for which tree was the pollen or seed donor)  
337 we utilize genotyped markers separately to consider whether a given pedigree is for a mother-  
338 father pair, or for a father-mother pair (i.e., we only considered nuclear markers for a potential  
339 mother, and all markers for a potential father). The most probable pedigree for each seedling was  
340 identified by assessing the proportion of the proposed pedigree across chains in the Gibbs  
341 sampler (as in Moran & Clark 2011), in which we used 500,000 steps and a burn-in of 30,000.  
342 This method was further modified to improve computational efficiency by multiprocessing  
343 appropriate elements of the script by utilizing custom python scripts run on the VCU Center for  
344 High Performance Computing cluster (CHiP) and the SNOW library (v0.4-2; Tierney *et al.* 2016) in  
345 R (v3.3.3; R Core Team 2017). We replicated each run three times, and judged convergence  
346 within and between runs in R.



347 **Using parentage analysis to further quantify fine-scale gene flow**

348 In addition to estimates of the mean seed and pollen dispersal from dispersal kernels  
349 estimated during parentage analysis (see above), we used these parentage assignments to  
350 further classify fine-scale gene flow at TEF. Using the full set of most probable pedigrees identified  
351 from parentage analysis, we first quantified the number of in-plot vs. out-of-plot dispersal events  
352 averaged across each replicate for a given treatment. Then, using the most probable parentage  
353 assignment for each offspring, we quantified mean dispersal distances from sampled mothers to  
354 seedlings, as well as between sampled fathers to sampled mothers. To better account for  
355 uncertainty in parentage assignment (i.e., to account for fractional parentage assignment), we  
356 also calculated mean dispersal distance by treatment by considering all pedigrees with known  
357 individuals weighted by the probability of assignment. Specifically, for mean seed dispersal, for  
358 each seedling we calculated the weighted average of mother-offspring distances across  
359 pedigrees of non-zero probability that included known mothers in the dataset. Here, each weight  
360 was the probability of assignment,  $p_{seed,pedigree}$ , divided by the probability of assignment of this  
361 seedling to a known mother ( $1 - U_M$ ) where  $U_M$  is the sum of the probabilities across all non-zero  
362 pedigrees that included an unsampled mother. Treatment-level averages were then calculated  
363 across these weighted distances. For pollen dispersal, for each seedling we considered only  
364 pedigrees of non-zero probability where both the mother and father were known, weighting each  
365 distance by the probability of assignment,  $p_{seed,pedigree}$ , divided by the probability of assignment  
366 to known parents ( $1 - U_{seed,pedigree}$ ) where  $U_{seed,pedigree}$  is the sum of the probabilities across all  
367 non-zero pedigrees that included at least one unsampled parent. Treatment-level averages were  
368 then calculated from these weighted distances and significance was determined using a Kruskal-  
369 Wallis test with an alpha value of 0.05.

370 Scripts used in analyses described above can be found in IPython notebook format (Pérez  
371 & Granger 2007) at <https://github.com/brandonlind/teakettle>.

## 372 **Results**

### 373 **Analysis of tree spatial structure**

#### 374 ***Univariate Analysis***

375         Across treatments, *P. lambertiana* adults generally exhibited spatial aggregation at  
376 distance classes less than 20 meters, where this signal decreased with increasing disturbance  
377 intensity with UN plots showing the greater magnitudes of  $g_{\text{inhom}}(r)$  than UC or BC plots at these  
378 small distance classes (Figure 2 first row). For adult shade-tolerant species (*A. magnifica* and *A.*  
379 *concolor* combined), the extent of spatial aggregation at large distance classes decayed with  
380 increasing disturbance intensity (Figure 2 second row) where UC treatments generally exhibited  
381 greater magnitudes of  $g_{\text{inhom}}(r)$  than BC treatments in small distance classes. For *P. lambertiana*  
382 seedlings the spatial structure of individuals was also similar across treatments, though UN  
383 treatments generally had significant aggregation and much larger magnitudes of  $g_{\text{inhom}}(r)$  at  
384 larger distance classes than other treatments, while seedlings in BC treatments exhibited greater  
385 magnitudes of  $g_{\text{inhom}}(r)$  across small distance classes than either UC or UN plots (Figure 2 third  
386 row).

#### 387 ***Bivariate Analysis***

388         The spatial affinity of *P. lambertiana* seedlings to *P. lambertiana* adults,  
389  $g_{\text{inhom,seedling,adult}}(r)$ , generally ranged from randomness ( $g_{\text{inhom,seedling,adult}}(r) = 1$ ) to spatial  
390 inhibition ( $g_{\text{inhom,seedling,adult}}(r) < 1$ ) with decreasing intensity of disturbance (i.e., from  
391 undisturbed UN plots, to thin-only UC plots, to thinned-and-burned BC plots). UN plots tended to  
392 show consistent inhibition across distance classes greater than about 15m, whereas observed  
393  $g_{\text{inhom,seedling,adult}}(r)$  for UC plots tended to align with the lower extent of the confidence interval  
394 with fewer instances of significant inhibition between adult and seedlings (Figure 3). A similar  
395 trend for increasing spatial inhibition between *P. lambertiana* seedlings and shade-tolerant adults  
396 ( $g_{\text{inhom,seedling,adult}}(r)$ ), as well as for *P. lambertiana* adults and shade-tolerant adults

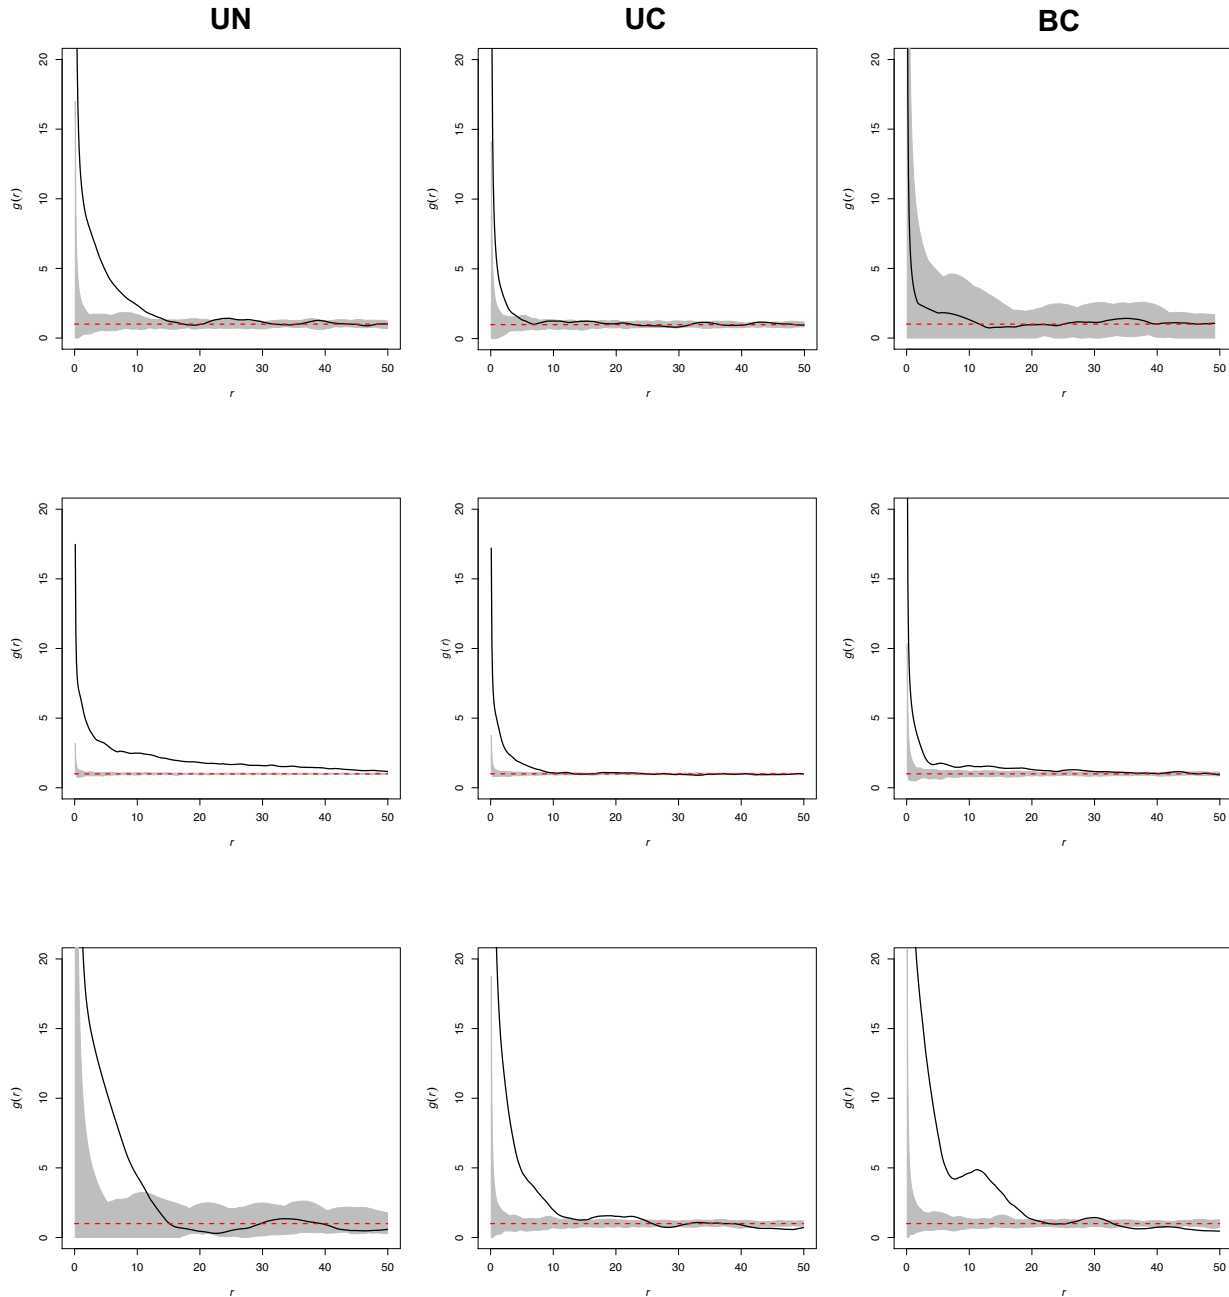

397

398

399

400 **Figure 2** Representative figures of univariate analysis of spatial structure,  $g_{inhom}(r)$ , by treatment replicate  
 401 for each distance class,  $r$ . First row: adult *P. lambertiana* (PiLa); second row: adult shade tolerant (*A.*  
 402 *magnifica* and *A. concolor* = ShadeTol); third row: *P. lambertiana* (PiLa) seedlings. Disturbance intensity  
 403 increases by column from left to right. These figures show that with increasing disturbance intensity there  
 404 is a diminution of the degree of spatial structure within classes. Gray : null confidence envelope; Solid black  
 405 line : observed  $g_{inhom}(r)$ . Red dashed line : null expectation of complete spatial randomness,  $g_{inhom}(r) =$   
 406 1. Individuals are aggregated if  $g_{inhom}(r) > 1$ , inhibited if  $g_{inhom}(r) < 1$ . See Supplemental Figures S1-S3  
 407 for all plots.

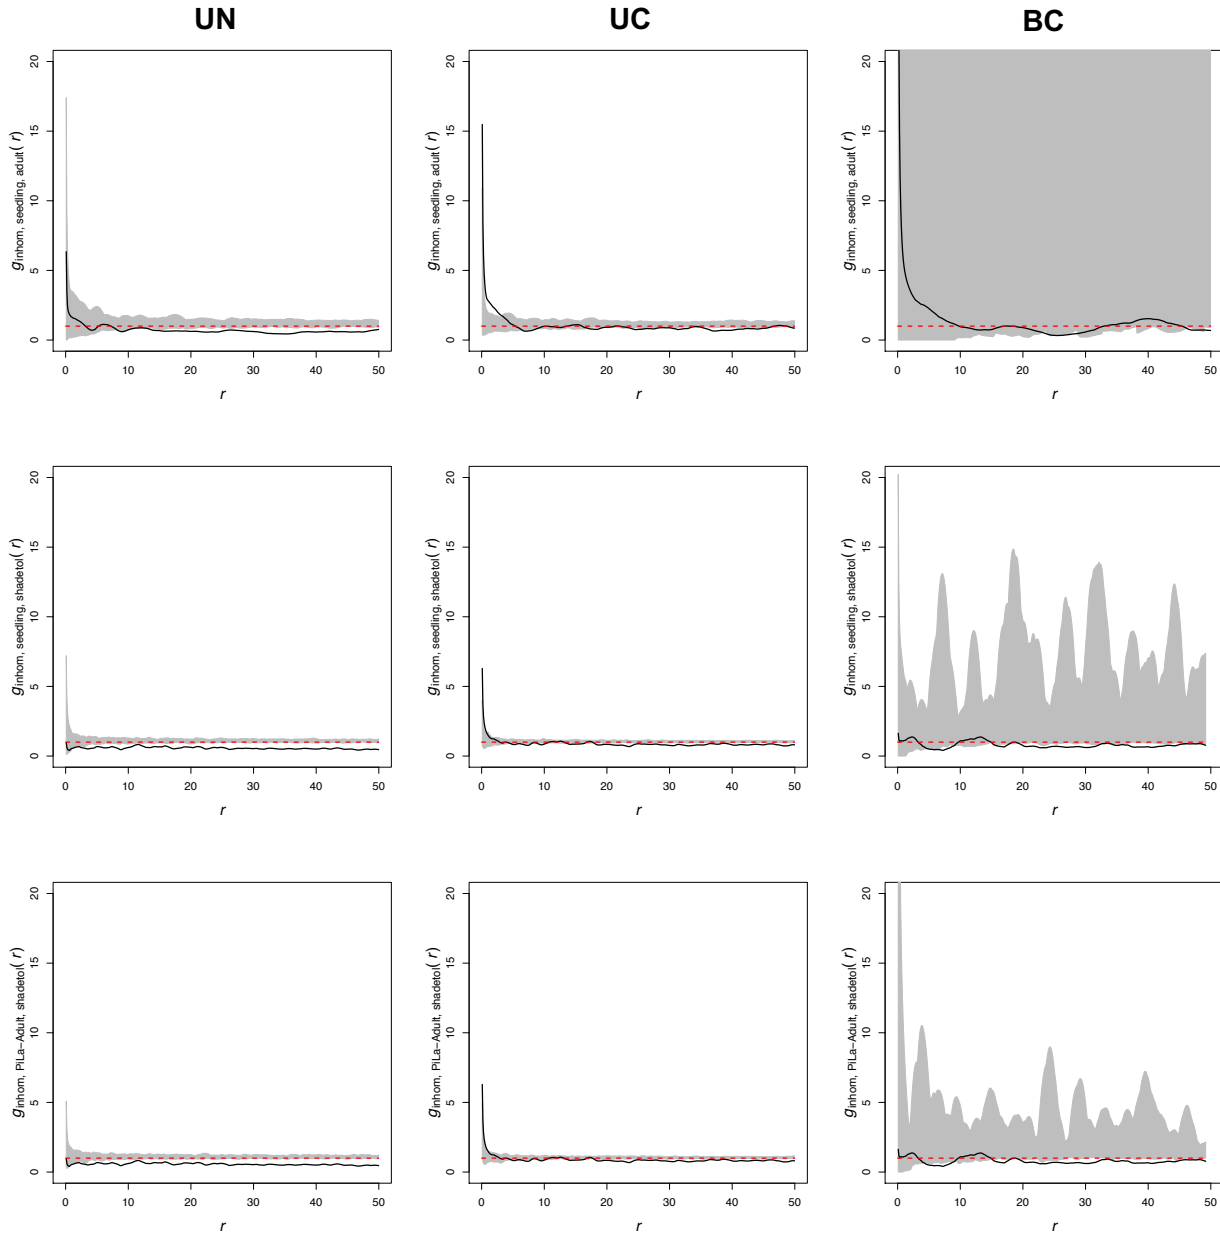

408

409

410

411

412

413

414

415

416

417

418

419

420

421

422

**Figure 3** Representative figures of bivariate analysis of spatial structure,  $g_{inhom,i,j}(r)$ , between: first row: *P. lambertiana* seedlings (seed) and *P. lambertiana* adults; second row: *P. lambertiana* seedlings and shade tolerant adults; third row: *P. lambertiana* adults to shade tolerant adults. Disturbance intensity increases by column from left to right. These figures show that the two classes compared are generally inhibited spatially by the presence of the other, and that with increasing disturbance there is a diminution of the degree of spatial inhibition between classes. Gray : null confidence envelope; Solid black line : observed  $g_{inhom,i,j}(r)$ . Red dashed line : null expectation of complete spatial random-ness,  $g_{inhom,i,j}(r) = 1$ . Individuals are aggregated if  $g_{inhom,i,j}(r) > 1$ , inhibited if  $g_{inhom,i,j}(r) < 1$ . The gray shading in the third column of the first row indicates the null confidence envelope extended beyond the limit of the y-axis, where the pattern of the confidence envelope seen in the third column of the second and third rows is caused by sample size varying among distance classes. It should be noted that the observed values for all comparisons generally fall below the  $y = 1$  expectation except for some short distance classes. See Supplemental Figures S4-S6 for all plots.

423 ( $g_{inhom, PiLa-adult, shadetol}(r)$ ), was also observed (Figure 3) where UN treatments generally had a  
424 greater inhibition than UC or BC plots, though BC plots also exhibited some evidence of spatial  
425 inhibition between groups. The results from the uni- and bivariate analyses of spatial patterns at  
426 TEF suggest that pines are generally clustered with other pines, shade-tolerant individuals are  
427 clustered with other shade-tolerant individuals, but spatial patterns of shade-tolerant adults  
428 generally show spatial inhibition with pine individuals of both classes. Additionally, *P. lambertiana*  
429 seedlings showed similar clustering across all treatments, suggesting a similar pattern of  
430 response to the environment by individual trees. Further, together with the univariate spatial  
431 clustering of *P. lambertiana* seedlings at small distance classes, these bivariate results suggest  
432 there may be ecological drivers influencing realized patterns of seedlings across  
433 microenvironments at TEF (e.g., perhaps sites with decreased competition for [or optimal levels  
434 of] water, nutrients, or light).

#### 435 **Diversity measures**

436 To compare our results with measures often used across the literature to investigate  
437 genetic effects of forest management we calculated various genetic diversity measures (see  
438 Methods). Genetic diversity measures (Table 1) seemed to be most influenced by census size  
439 across the various measures we estimated here. For instance, census size increased from BC ( $n$   
440 = 109 individuals) to UN ( $n$  = 557 individuals) to UC ( $n$  = 682 individuals) where related diversity  
441 measures of  $A_T$ ,  $A$ ,  $A_e$ , and  $A_p$  followed this trend. Observed heterozygosity was greatest for UN  
442 plots, followed by BC and UC plots, while expected heterozygosity decreased from UC to BC to  
443 UN (Table 1). Thus, no trend was observed between diversity measures and increasing  
444 disturbance treatment at TEF.

445 Hierarchical  $F$ -statistics were calculated with nuclear markers to compare the extent of  
446 fixation within and across treatment types, with individuals nested in replicates, replicates nested  
447 in treatments, and treatments nested within TEF. The overall multilocus  $F_{ST}$  ( $F_{rep,TEF}$ ) at TEF was  
448 0.075, consistent with estimates of many *Pinus* species across various spatial scales (Howe et

449 **Table 1** Genetic diversity measures (standard deviation) by treatment.  $N$  : census number of individuals  
 450 [adults, seedlings];  $A_T$  : total number of alleles;  $A$  : mean number of alleles per locus;  $A_e$  : effective number  
 451 of alleles (harmonic mean across loci);  $H_o$ ,  $H_e$  : respectively the observed and expected heterozygosity for  
 452 nuclear markers;  $A_p$  : average number of private alleles. For  $A$ ,  $A_e$ ,  $H_o$ , and  $H_e$ , values indicate averages  
 453 across loci, where values for each locus were calculated across all three treatment replicates  
 454 simultaneously.  $H_o$  and  $H_e$  used only nuclear markers, whereas other genetic diversity columns considered  
 455 all loci.

| Treatment | $N$           | $A_T$  | $A$          | $A_e$       | $H_o$       | $H_e$       | $A_p$ |
|-----------|---------------|--------|--------------|-------------|-------------|-------------|-------|
| UN        | 557 [236,321] | 180    | 25.71 (6.50) | 3.23 (1.58) | 0.87 (0.06) | 0.77 (0.06) | 46    |
| UC        | 682 [307,375] | 210    | 30.00 (7.76) | 6.20 (3.07) | 0.57 (0.30) | 0.84 (0.10) | 73    |
| BC        | 109 [42,67]   | 107    | 15.29 (6.80) | 4.80 (2.46) | 0.82 (0.08) | 0.82 (0.07) | 5     |
| Mean      | 449 [195,254] | 165.67 | 23.67        | 4.74        | 0.75        | 0.81        | 41.3  |

456  
 457 al. 2003), suggesting that the majority of genetic variation was partitioned more so within plots  
 458 than between plots. The  $F_{rep,TEF}$  for individual markers varied: rps02 ( $F_{rep,TEF} = 0.019$ ), rps12  
 459 ( $F_{rep,TEF} = 0.037$ ), rps39 ( $F_{rep,TEF} = 0.148$ ), rps50 ( $F_{rep,TEF} = 0.103$ ). Considering only genotypes  
 460 across replicates of a given treatment, treatment-level estimates of  $F_{rep,tx}$  also varied ( $F_{rep,UN} =$   
 461  $0.011$ ,  $F_{rep,UC} = 0.109$ ,  $F_{rep,BC} = 0.035$ ) but showed no pattern with increasing disturbance  
 462 intensity. Pairwise  $F_{rep,tx}$  comparisons between treatments were calculated by considering  
 463 genotypes across two treatments simultaneously and were used to compare the extent of fixation  
 464 across disturbance intensity. Here, the three comparisons ranged from 0.050 (UC and UN) to  
 465 0.055 (UC and BC) to 0.075 (BC and UN) indicative of increasing relative fixation with increasing  
 466 disparity for the intensity of disturbance for a given comparison.

#### 467 **Analysis of spatial genetic structure**

468 Analysis of spatial genetic autocorrelation (sensu Smouse & Peakall 1999) was carried  
 469 out at TEF to better understand how treatment affects standing genetic structure (*P. lambertiana*  
 470 adults x *P. lambertiana* adults), how this standing genetic structure relates to the genetic structure  
 471 of seedlings (*P. lambertiana* seedlings x *P. lambertiana* seedlings), and the tendency of alike  
 472 genotypes to be aggregated or inhibited across the treatments as the stands continue to develop



473

UN

UC

BC

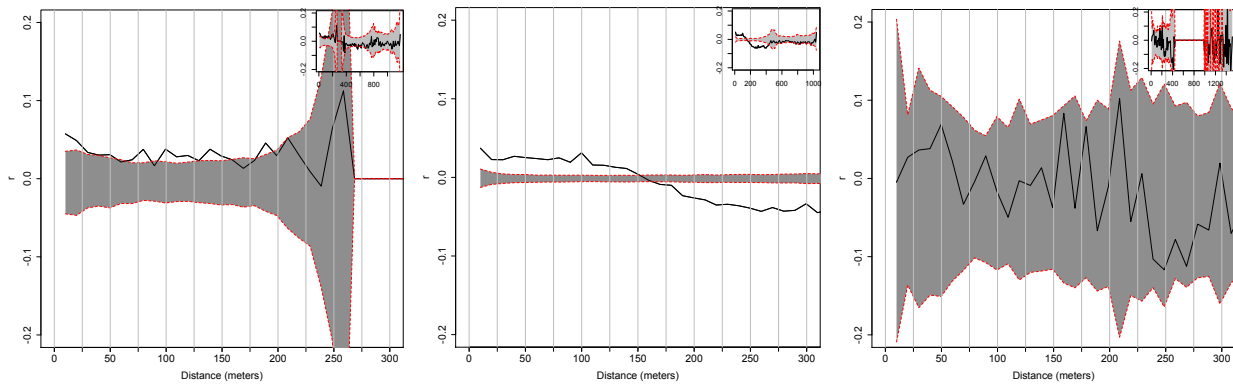

474

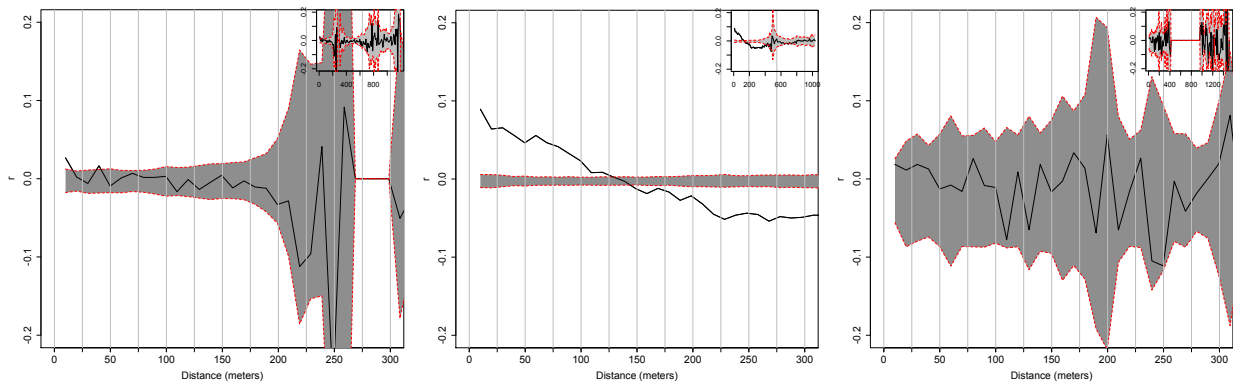

475

476

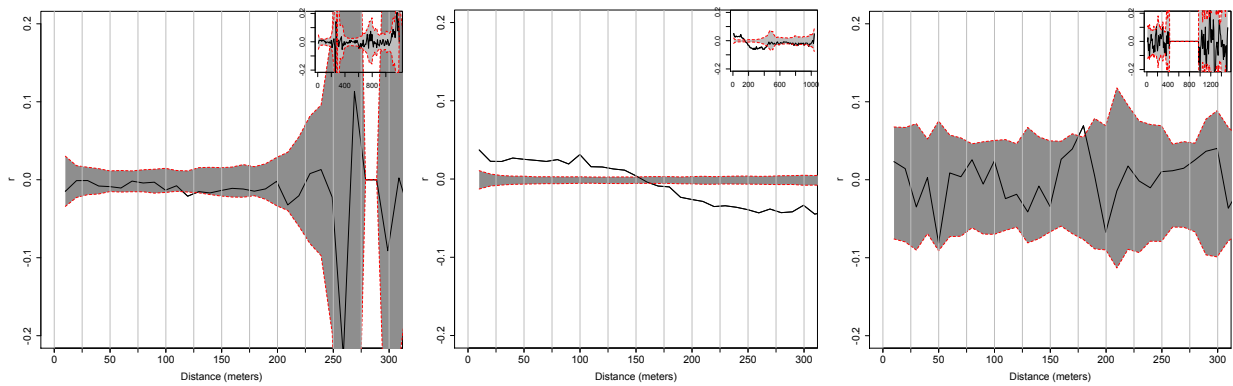

477

478

479 **Figure 4** Analysis of spatial genetic structure (sensu Smouse & Peakall 1999) between *P. lambertiana*  
 480 adults (first row), *P. lambertiana* seedlings (second row), and between *P. lambertiana* adults and seedlings  
 481 (third row) by treatment (columns) across distance classes within plots (main panel) or across TEF (insets).  
 482 Values of  $r_g^h = 0$  indicate random spatial patterns of genotypes,  $r_g^h > 0$  indicate clustering of alike genotypes,  
 483 and  $r_g^h < 0$  indicate spatial inhibition of alike genotypes.

484 after treatment (*P. lambertiana* adults x *P. lambertiana* seedlings). In all comparisons, spatial  
485 genetic structure in BC treatments did not differ significantly from a random spatial distribution of  
486 genotypes (last column Figure 4), perhaps due to the relatively small census sizes (Table 1) in  
487 distance-class bins. However, there seems to be an effect of treatment on the spatial patterning  
488 of genotypes of adults in the UC and UN stands (first row Figure 4). While the natural fire-  
489 suppressed stands (UN) exhibited small but significant spatial genetic structure for most distance  
490 classes up to 200m, UC stands resulted in significant aggregation of adult genotypes at a greater  
491 degree than UN up to 150m, where genotypes became spatially inhibited up to the maximum  
492 distances in stands ( $200(\sqrt{2})$ m; Figure 4). These patterns resulted in spatial distributions of  
493 seedling genotypes that were randomly distributed except for very short distance classes in UN  
494 treatments, and for UC seedlings, resulted in the general pattern observed for UC adults albeit to  
495 a higher degree of both aggregation and inhibition (second row Figure 4). As a result, alike  
496 genotypes between adults and seedlings were aggregated up to 150m in UC plots, whereas this  
497 relationship in UN treatments resulted in negative values of  $r_{g,adult,seed}^h$  that bordered the  
498 confidence envelope for spatial inhibition but were not significantly different from a random spatial  
499 distribution of genotypes (third row of Figure 4). While the genetic structure of adults is due to the  
500 interaction of the effect of treatment on pretreatment conditions, the long-term dynamics of these  
501 stands will be influenced by seedling ingrowth. These results suggest that UC treatments may, in  
502 the long term, increase the relatedness of individuals across short spatial scales less than 150m  
503 relative to either BC or UN treatments. This will be particularly exacerbated if gene flow occurs at  
504 similarly fine spatial scales (see below).

### 505 **Quantifying fine-scale gene flow**

#### 506 *In-plot vs. out-of-plot dispersal events*

507 To understand how gene flow across plots is influenced by treatment, we quantified the  
508 number of in-plot and out of plot dispersal events from pedigrees identified as

509

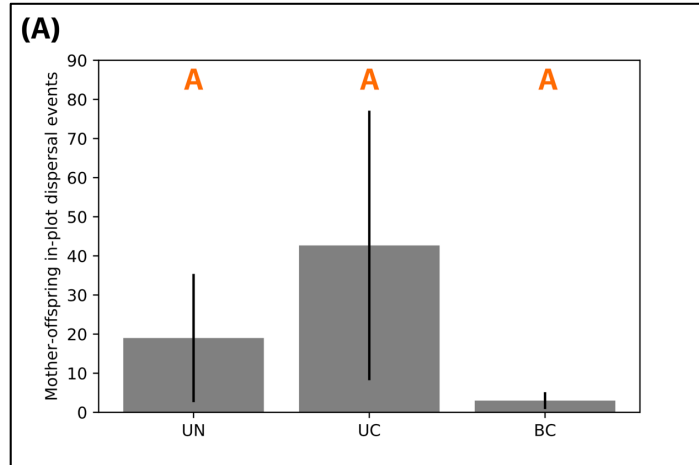

510

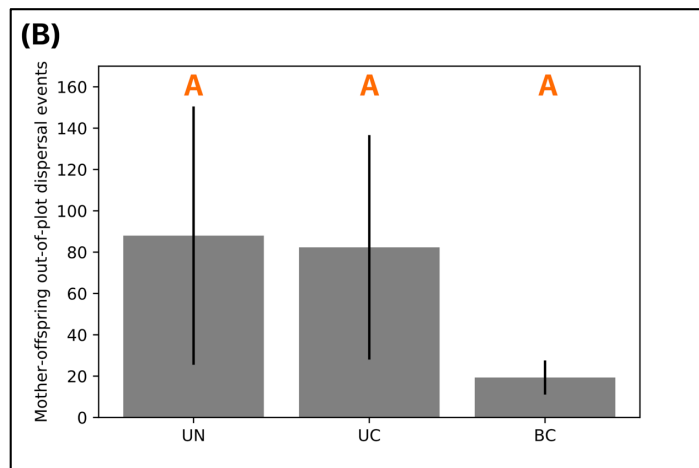

511

512 **Figure 5** Mother-offspring dispersal events by treatment for (A) dispersal between in-plot individuals, (B)  
513 dispersal into plot from an out-of-plot mother, and (C) the ratio of these values. There were no events in  
514 which a known mother dispersed seed to another plot, therefore B is utilizing information from parentage  
515 analysis that indicated the mother of a given seedling was not sampled. Orange letters within each plot  
516 show significant differences between medians, as inferred from separate Kruskal-Wallis tests (see main  
517 text of Results). Vertical lines indicate standard deviations.

518 most probable from our parentage analysis. To account for sample size differences, we also  
519 calculated the ratio of these values. The number of in-plot and out-of-plot dispersal events  
520 between mother and offspring differed by treatment (Figure 5A-B) but not significantly so ( $p >$   
521  $0.4297$ ). The ratio of these values differed by treatment as well (Figure 5C), with UC having the  
522 greatest proportion of in-plot dispersal events but overall there were no significant differences  
523 among treatments ( $p = 0.1926$ ).

524 We next quantified the number of in-plot and out-of-plot dispersal events of pollen from  
525 the most probable pedigrees identified from parentage analysis. In these cases, out-of-plot pollen  
526 dispersal events were tallied as an in-plot mother receiving pollen from an unsampled or out-of-  
527 plot father. As with mother-offspring dispersal events we also calculated a ratio of these values.  
528 The UC treatment exhibited the most in-plot pollen dispersal events, followed by UN and BC  
529 (Figure 6A), though these comparisons were not significant using a Kruskal-Wallis test ( $p =$   
530  $0.5073$ ). UN and UC treatments exhibited similar levels of out-of-plot dispersal events (Figure  
531 6B), which differed (though not significantly,  $p = 0.1376$ ) from BC out-of-plot events. The ratio of  
532 in-plot vs. out-of-plot dispersal events increased with increasing disturbance (Figure 6C) but did  
533 not differ significantly ( $p = 0.1030$ ).

#### 534 *Median dispersal distances by treatment*

535 Considering the most probable parentage from our model, we calculated the median seed  
536 dispersal distances between offspring and known mothers, as well as between the median pollen  
537 dispersal between known mothers and fathers (see Methods). Median seed dispersal varied by  
538 treatment, being greatest for UN and decreasing with increasing disturbance intensity (Figure 7A).  
539 Results from a Kruskal-Wallis test indicated significant differences between groups ( $p = 0.0480$ ),  
540 with *post hoc* tests indicating significant differences between UN and BC ( $H = 4.34$ ,  $p = 0.0372$ )  
541 but not between UN and UC ( $H = 2.77$ ,  $p = 0.0959$ ) or between UC and BC ( $H = 2.75$ ,  $p = 0.0970$ ;  
542 Figure 7A). Median pollen dispersal also varied by treatment, being greatest for BC treatments,  
543 followed by UN and UC treatments, which did not differ significantly ( $p = 0.1381$ ; Figure 7B).

544

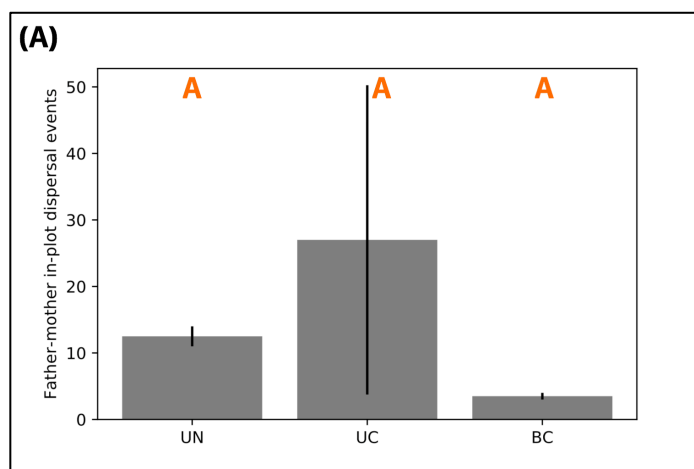

545

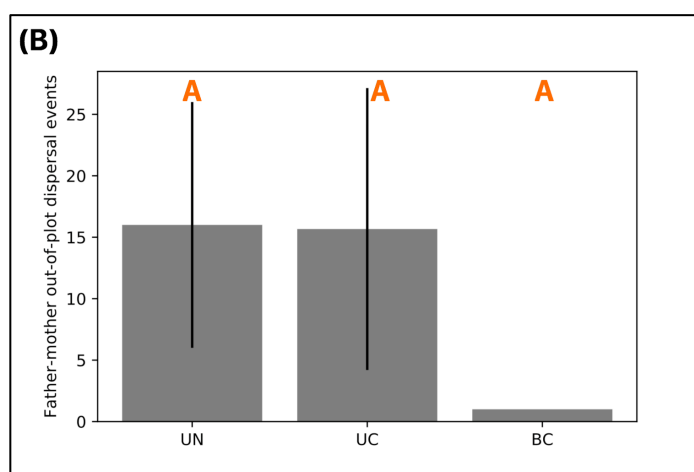

546

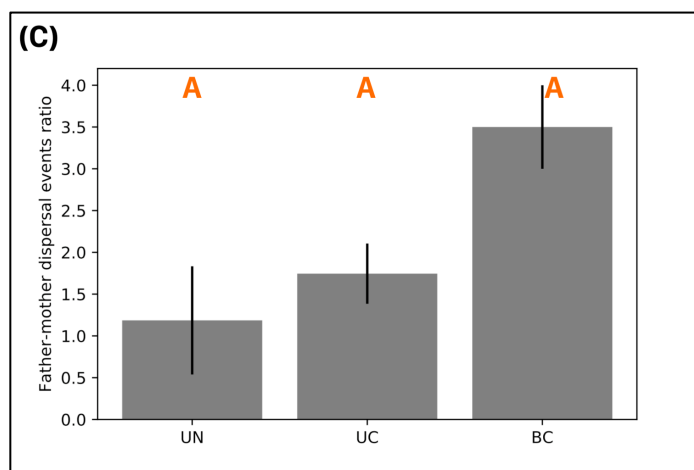

547 **Figure 6** Father-mother dispersal events by treatment for (A) dispersal between in-plot individuals, (B)  
548 dispersal into plot from an out-of-plot mother, and (C) the ratio of these values. Plot-level tallies were those  
549 of in-plot mothers receiving pollen from either an in-plot father (A) or an out-of-plot (sampled or unsampled)  
550 father (B). Orange letters within each plot show significant differences between medians, as inferred from  
551 Kruskal-Wallis tests (see main text of Results). Vertical lines indicate standard deviations.

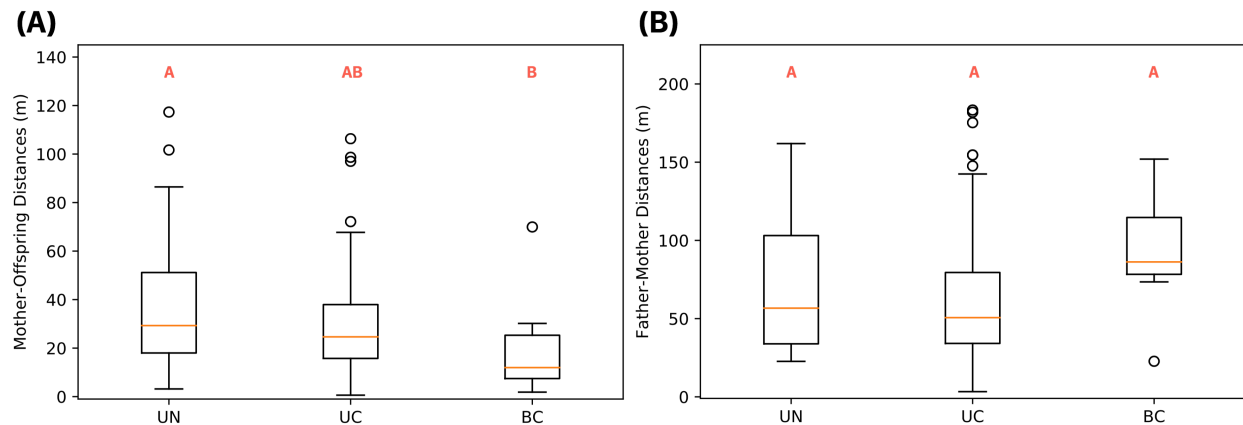

552  
553 **Figure 7** Dispersal distances for seed (A) and pollen (B) calculated from the most probable pedigree from  
554 parentage analysis, considering only pedigrees with known mothers (A) or known parents (B). Orange  
555 letters within each plot show significant differences between medians, as inferred from Kruskal-Wallis tests  
556 for mother-offspring and father-mother dispersal distances (see main text of Results).

557

558 These realized distances were roughly in line with, but smaller than, mean dispersal distances  
559 estimated from dispersal kernel shape parameters in the parentage analysis: mean seed  
560 dispersal = 65m (95% credible interval: 57-75); mean pollen dispersal = 170m (95% CI: 150-190;  
561 Figure 8).

562 To consider uncertainty in parentage assignment, we calculated weighted average  
563 dispersal distances for seed and pollen dispersal (see Methods). Assignments to mothers of out-  
564 of-plot adults were less common than for assignments to in-plot fathers, as can be seen from the  
565 blocks (replicates) within treatment of Figure 9. Using this set of fractional parentage, we  
566 calculated weighted average distances for each seed and nested these distances within  
567 treatments (see Methods). We first considered mother-offspring and father-mother dispersals  
568 from fractional parentage where the identified adults could originate in any treatment at TEF.  
569 Distances differed significantly by treatment (Figure 10A;  $H = 7.91$ ,  $p = 0.0191$ ) where UN and  
570 UC were significantly different ( $H = 8.11$ ,  $p = 0.0044$ ) but not between any other comparison ( $H$   
571 range = [0.0042,0.6755],  $p > 0.4111$ ). Father-mother distances (Figure 10B) also differed by  
572 treatment ( $H = 41.16$ ,  $p = 1.15E-9$ ), with median dispersal distance decreasing from BC to UN to



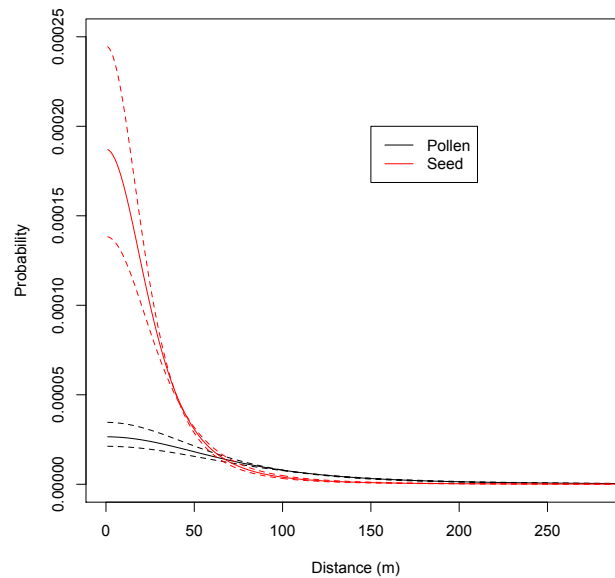

573 **Figure 8** Fitted 2D-t dispersal kernel for seed (red) and pollen (black) using shape parameters inferred from  
574 parentage analysis (*sensu* Moran & Clark 2011). Dashed lines show the 95% credible interval. This figure  
575 is truncated at the maximum distance within plots ( $200\sqrt{2}m$ ) to focus on differences at short distances.  
576

577

578 UC, where all pairwise considerations were also significant ( $H$  range = [5.21,27.18],  $p$  range =  
579 [1.85E-07, 0.0224]).

580 Because the proximity of the treatment replicates at TEF may interact with dispersal  
581 distance estimates, we also considered dispersal distances within plot tallied within treatments  
582 using weighted distances as described above. Median values of mother-offspring in-plot distances  
583 decreased with increasing disturbance intensity (Figure 10C) and differed by treatment ( $H =$   
584 47.10,  $p = 5.91E-11$ ), but only between UN and UC ( $H = 4.29$ ,  $p = 0.0382$ ) and between UN and  
585 BC ( $H = 5.83$ ,  $p = 0.0253$ ) and not between UC and BC treatments ( $H = 0.95$ ,  $p = 0.3291$ ). In-plot  
586 father-mother distances (Figure 10D) were significantly different across treatments ( $H = 13.89$ ,  $p$   
587 = 0.0010), with BC having greater distances than either UN ( $H = 5.83$ ,  $p = 0.0157$ ) or UC ( $H =$   
588 5.07,  $p = 0.0242$ ), and UC exhibiting greater distances than UN ( $H = 5.00$ ,  $p = 0.0253$ ).

589

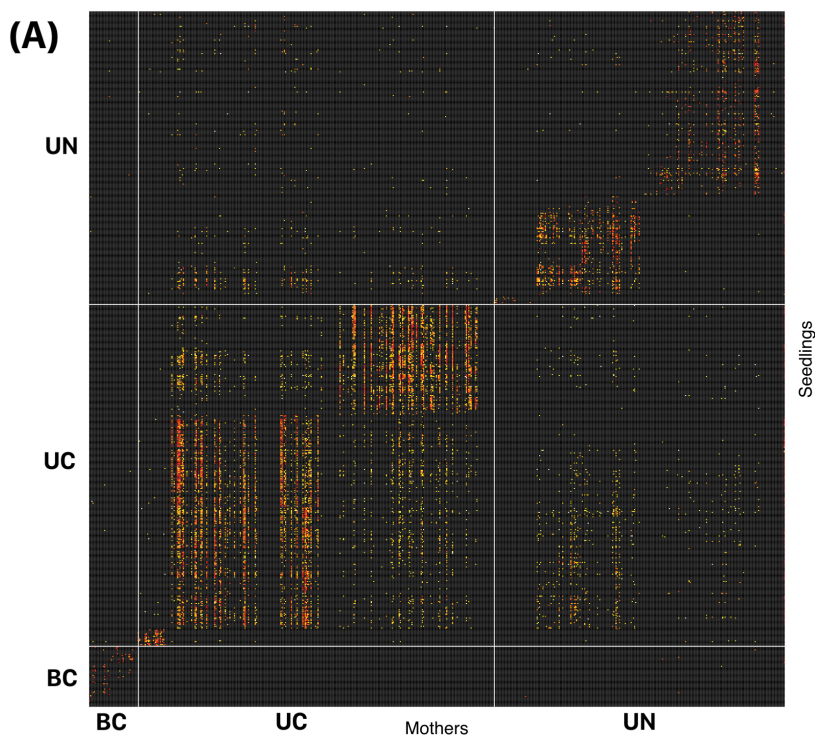

590

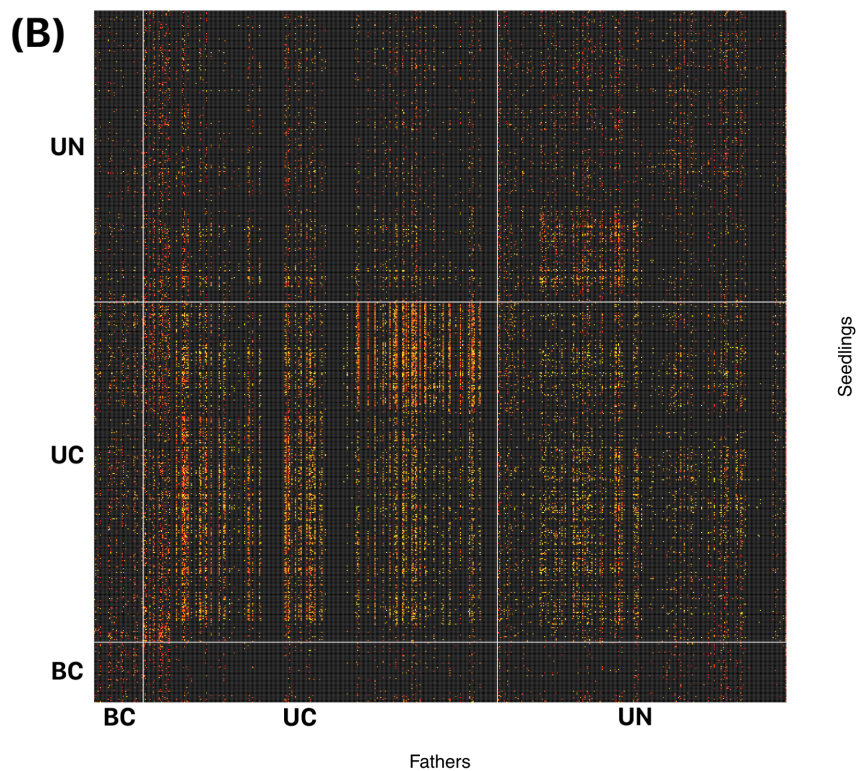

591 **Figure 9** Fractional parentage across parentage analysis cycles for (A) maternal assignment and (B)  
592 paternal assignment (see Methods) with adult individuals along x-axes and seedling individuals along y-  
593 axes. Each cell represents the fraction of the cycles a particular seedling was assigned to a given adult  
594 (black ~ 0 to red to orange to yellow to white ~1).

595

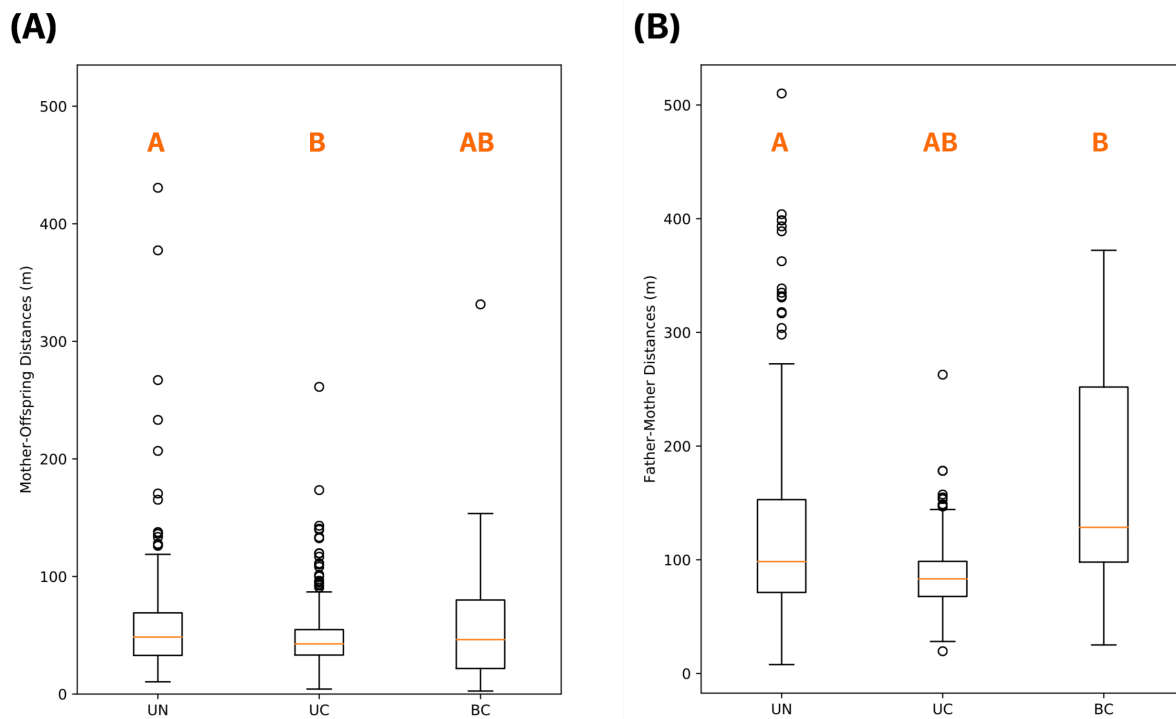

596

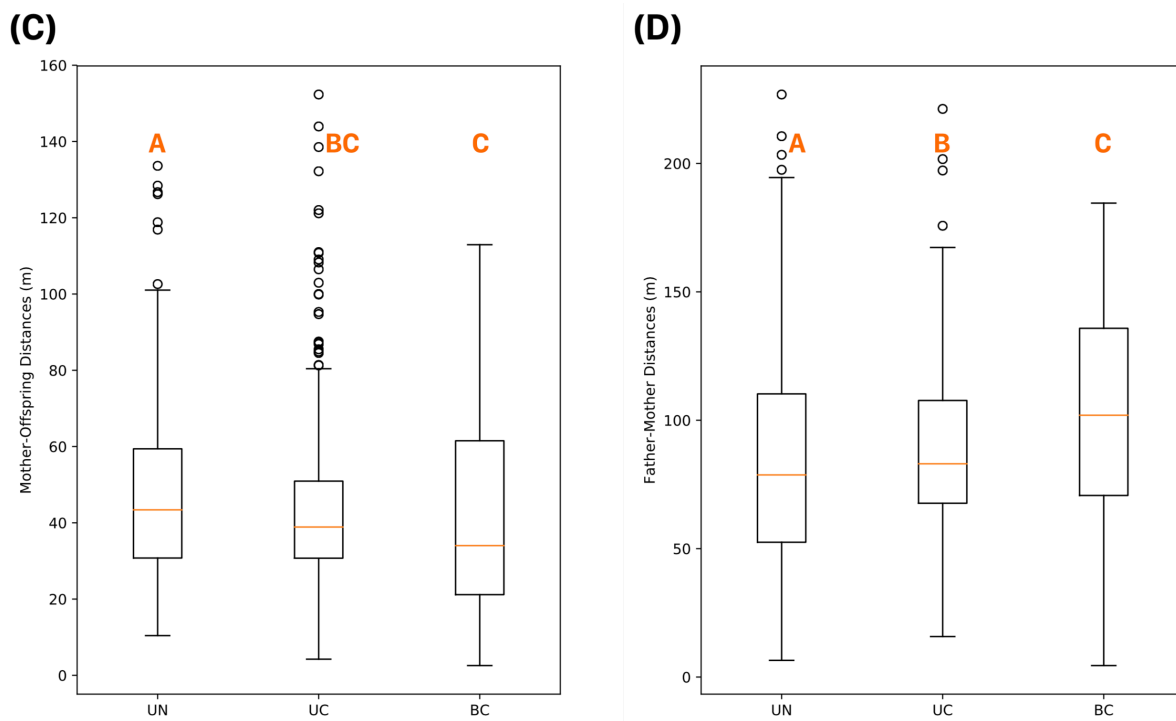

597 **Figure 10** Dispersal distances between mothers and offspring (first column) and between fathers and  
598 mothers (second column) using assigned adults from any location (A-B) and for only in-plot individuals (C-  
599 D). Orange letters within each plot show significant differences between medians, as inferred from separate  
600 Kruskal-Wallis tests (see main text of Results).

601 **Discussion**

602           Frequent fires were commonplace in historic forests of the Sierra Nevada, where forests  
603 exhibited relatively lower tree densities and a higher proportion of pine species (North *et al.* 2005;  
604 Knapp *et al.* 2013). Yet post-settlement fire suppression has led to forest densification that has  
605 caused instability in these systems and has increased the chances of uncharacteristic high-  
606 severity wildfire. As a result, thinning prescriptions are used to increase the resilience of  
607 constituent stands (SNFPA 2004; Agee & Skinner 2005; Schwilk *et al.* 2009; Safford *et al.* 2009).  
608 While these prescriptions can mimic the density-reducing effects of fire, and reduce fire severity,  
609 it is currently unknown how thinning, in isolation or through its interaction with managed fire, will  
610 alter evolutionary dynamics of ecologically important species such as *P. lambertiana* (SNEP  
611 1996). We characterized spatial and genetic structure of a fire-suppressed forest treated with a  
612 common thinning prescription in the Sierra Nevada and compared this with its interaction with  
613 prescribed fire and with a no-thin-no-fire control treatment. Our results suggest that spatial  
614 structure of constituent species is a result of the interaction between treatment and ecology where  
615 pines are often clustered with other pines, shade-tolerant trees are often clustered with other  
616 shade-tolerant trees, and pine seedlings often are inhibited by both adult pine and shade-tolerant  
617 individuals. While genetic diversity statistics are informative of stand-level diversity, they are less  
618 informative regarding ongoing evolutionary dynamics as a result of treatment as they do little to  
619 predict inbreeding of future generations nor the scale at which mating events are to occur. Used  
620 in isolation, diversity indices leave researchers to speculate about ongoing processes and future  
621 outcomes, while monitoring of processes that affect fitness provides more meaningful inferences  
622 which can be directly used by land managers.

623           From the analysis of spatial genetic structure (*sensu* Smouse & Peakall 1999), and despite  
624 spatial inhibition between adults and seedlings across treatments, our results suggest that  
625 unburned thinned stands (UC treatments) result in the increase of fine-scale similarity of adult to  
626 seedling genotypes relative to control (UN treatments) or thinned-and-burned stands (BC

627 treatments). Parentage analysis offered additional quantification of fine-scale gene flow and  
628 suggested that effective seed and pollen dispersal within plots generally decreased and  
629 increased, respectively, with the increasing intensity of disturbance, perhaps due to an increase  
630 in microsite suitability for *P. lambertiana*, or for adults, the availability of potential mates. Our  
631 results were measured from individuals remaining or regenerating 13 years post-treatment, very  
632 near the historical fire return interval for this area. Thus, ongoing dynamics should be monitored,  
633 and will likely change through time, as stands with different treatments continue to develop and  
634 respond to subsequent disturbances such as fire.

635

#### 636 *The genetic effects of forest management*

637 With some exceptions, studies investigating the genetic consequences of forest  
638 management have centered around the impact on genetic diversity indices (see Table 1 in  
639 Ratnam *et al.* 2014). This focus is likely due to the fact that highly outcrossing tree species often  
640 suffer from elevated inbreeding depression, where survival and reproduction of subsequent  
641 generations may be impacted. In such cases, genetic diversity has been used as an index for  
642 evolutionary potential, likely attributable to the consequences of the relative contribution of  
643 additive genetic variance to phenotypic variance (i.e., narrow-sense heritability) in the breeder's  
644 equation (Lynch & Walsh 1998), but the use of heritability itself as a measure of evolvability comes  
645 with important caveats (e.g., see Hansen *et al.* 2011). Further, such diversity indices have been  
646 used to assess the relative reduction of alleles due to harvest intensity, where the removal of  
647 individuals from stands will likely reduce the diversity of alleles present. Here, management  
648 resulting in population bottlenecks is of concern. While these premises are important to  
649 investigate, the use of genetic diversity indices as the sole method for inference of management  
650 impact are limiting with regard to evolutionary outcomes. If the focus is to be on management  
651 impact on evolutionary potential, processes that influence evolutionary fitness should be  
652 investigated instead (e.g., mating systems, effective dispersal, fecundity, spatial genetic structure,

653 pollen pool heterogeneity, juvenile survival; Lowe *et al.* 2015). Many traits with fitness  
654 consequences in trees are of a polygenic basis (Lind *et al.* 2018), where any given underlying  
655 positive-effect locus has minimal influence on the trait. In such cases, fixation (as measured by a  
656 handful of putatively neutral markers) at some of the underlying causative loci can be ameliorated  
657 by selection for combinations of alleles at other loci. Therefore, while alleles with little to no effect  
658 on fitness are informative for demographic processes, these should not be conflated with loci  
659 under selection, particularly loci under strong negative selection with important implications for  
660 inbreeding depression. Such neutral markers could be better utilized in assessing consequences  
661 *within* processes that directly affect fitness. However, in cases where spatial genetic relatedness  
662 is increased as a result of management, or individuals become increasingly sparse, wasted  
663 reproductive effort (e.g., embryo abortion, or high juvenile mortality) due to increased instances  
664 of consanguineous or self-mating events may play an important role in ongoing population  
665 dynamics (Kärkkäinen *et al.* 1999; Sorensen 2001), particularly when seed rain of heterospecifics  
666 exceeds effective reproductive output of historical or ecologically important species (e.g., as for  
667 *P. lambertiana* at TEF, Zald *et al.* 2008).

668

#### 669 *Dispersal dynamics of tree species*

670 The analysis of spatial genetic structure and gene flow within and across populations of  
671 trees can elucidate ongoing evolutionary dynamics, as this spatial structure is a result of selective  
672 and neutral processes acting across temporal and spatial scales (Hardy & Vekemans 1999;  
673 Oddou-Muratorio *et al.* 2004; Robledo-Arnuncio *et al.* 2004; Oddou-Muratorio *et al.* 2011). Thus,  
674 quantifying dispersal and mating system is an important component in understanding such  
675 patterns. There are multiple biological and ecological factors that shape dispersal dynamics and  
676 resulting mating systems, such as population density, degree of fragmentation, manner of  
677 pollination (e.g., anemophily, entomophily, or zoophily), relative reproductive output, phenotype  
678 (such as crown shape or height), interannual climatic variation, as well as stochastic variables



679 such as wind direction and strength (Burczyk *et al.* 1996; Dow & Ashley 1998; Robledo-Arnuncio  
680 *et al.* 2004, Burczyk *et al.* 2004; O'Connell *et al.* 2004). Compared with herbaceous and annual  
681 plants, trees have more extensive gene flow (Hamrick *et al.* 1992), though such distances are  
682 idiosyncratic to a given population, species, and system. For instance, estimates of pollen  
683 dispersal for *Pinus sylvestris* varied from between 17-29m based on paternity assignment  
684 (Robledo-Arnuncio *et al.* 2004) to 136m (Robledo-Arnuncio & Gil 2005) using the TwoGener  
685 method (Smouse *et al.* 2001) where 4.3% of mating events came from pollen dispersed over  
686 30km (Petit & Hampe 2006; Savolainen *et al.* 2007). Seed dispersal distances can also vary  
687 idiosyncratically, particularly for winged seeds or those that are also dispersed by animals, such  
688 as with *P. lambertiana*.

689         Spatial genetic structure will be a function of these dispersal consequences as well as  
690 their ecological interaction with the environment. While much of the quantification of such  
691 structure in trees has been carried out at regional or continental scales, examples exist for  
692 investigations at fine spatial scales below a few hundred meters. For instance, Marquardt *et al.*  
693 (2007) assessed spatial genetic structure of eastern white pine (*Pinus strobus* L.) as a function of  
694 management influence at Menominee Indian Reservation in northeastern Wisconsin. While  
695 spatial genetic structure within 100m differed by population, the strongest autocorrelation  
696 occurred at the least disturbed site (Marquardt *et al.* 2007). However, while they sampled both  
697 adults and natural regeneration they did not distinguish these two groups when inferring spatial  
698 genetic structure. Conversely, in Norway spruce (*Picea abies* L. Karst.) populations of northern  
699 Italy, Scotti *et al.* (2008) assessed spatial genetic structure of mitochondrial (maternally inherited)  
700 and chloroplast (paternally inherited) loci across both adults and saplings. While chloroplast  
701 haplotypes were uncorrelated across most distance classes up to 90m for both classes, the  
702 maternally inherited mitochondrial markers showed strong affinity below 30m, where this affinity  
703 was greater for saplings than for adults. This pattern was seen for *P. lambertiana* individuals at  
704 TEF as well, where both adults and seedlings were genetically structured at small distance

705 classes in UC treatments, though seedling genotypes were clustered to a higher degree than  
706 adults (Figure 4). To our knowledge however, few instances in the literature compare both spatial  
707 structure of trees with spatial genetic structure of tree genotypes. At TEF, seedlings were  
708 clustered at fine spatial scales across all treatments likely due to microsite suitability (as most  
709 cached seeds will likely persist only in suitable sites), but were only clustered genetically in UC  
710 treatments. As such, without genotypic data, investigators may be lead to spurious conclusions  
711 where it may be assumed that clustering of individuals also indicates clustering of genotypes.  
712 Further, ingrowth of *P. lambertiana* in UC treatments will likely be more related to nearby  
713 individuals, which may cause inbreeding and embryo abortion to a greater degree in subsequent  
714 generations than in other stands at TEF.

715

#### 716 *Management implications*

717 Our results suggest that management is affecting dispersal through the availability of  
718 suitable microsites for seedling establishment, as well as through the availability of mates. As  
719 disturbance intensity increased at TEF, mean effective seed dispersal generally decreased while  
720 effective pollen dispersal generally increased (Figure 7A-B), likely due to the proximity of suitable  
721 (e.g., unshaded) microsites and the availability of potential mates, respectfully. Using the inferred  
722 dispersal kernels (Figure 8), the vast majority of dispersal occurs across small distance classes,  
723 with the estimated probability of dispersal of pollen below 150m accounting for more than 90.2%  
724 of pollen dispersal events, while dispersal of seed below 50m (150m) accounts for 87.3% (99.2%)  
725 of dispersal events across TEF. Such a dispersal tendency will drive spatial genetic structure and  
726 will interact with environment (including management) to ultimately determine the patterns we  
727 observe across the landscape. Because UC treatments generally resulted in an increased spatial  
728 affinity of alike genotypes between adults and seedlings (Figure 4), short-term dynamics (decadal  
729 scales) may be dominated by mating events between related individuals. However, long-term  
730 dynamics will likely affect this structure as well. The strong levels of spatial genetic structure

731 observed in seedlings have been shown to decrease in adult stages because of self-thinning  
732 processes in other tree species (Hamrick *et al.* 1993; Epperson & Alvarez-Buylla 1997; Chung *et*  
733 *al.* 2003; Oddou-Muratorio *et al.* 2004), and may well occur at TEF as well. Even so, such  
734 consequences are dependent upon initial structure that may vary to differing degrees in  
735 undisturbed stands, or across the landscape. Long-term dynamics should be monitored as these  
736 stands continue to develop and respond to contemporaneous ecological pressures.

737

### 738 **Conclusion**

739         Understanding how thinning and fire prescriptions intended to decrease fire severity and  
740 restore ecosystem resilience influence evolutionary dynamics of historically dominant and  
741 ecologically important pine species is of paramount significance. We found that treatment of fire-  
742 suppressed populations of *P. lambertiana* differentially affects fine-scale spatial and genetic  
743 structure, and that seed and pollen dispersal increase and decrease, respectively, with  
744 disturbance intensity. Such dynamics are likely to remain unequilibrated in the short term, and  
745 therefore management would benefit from further monitoring of evolutionary dynamics that affect  
746 fitness in these forests (e.g., reproductive output, survival of seedlings). Further monitoring across  
747 broader spatial scales would also inform how these management prescriptions affect dynamics  
748 across a greater extent of environmental heterogeneity and how these evolutionary dynamics  
749 vary by locality. Such information will allow management to prescribe treatments in a regionally-  
750 and site-specific manner.

751 **Acknowledgments**

752 The authors wish to thank Britta Austin, Casey Harless, Erin Hobson, Nate Stearrett, and  
753 Alexandria Stylianou for help with field and lab work (and for being great people), VCU's Center  
754 for High Performance Computing, and to VCU for start-up funds awarded to AJE.

755 **References**

- 756 Adamack AT, Gruber B (2014) PopGenReport: simplifying basic population genetic analyses in  
757 R. *Methods in Ecology & Evolution* 5:384–387.
- 758 Adams WT, Zuo J, Shimizu JY, Tappeiner JC (1998) Impact of alternative regeneration methods  
759 on genetic diversity in coastal Douglas-fir. *Forest Science* 44:390–396.
- 760 Agee JK, Skinner CN (2005) Basic principles of forest fuel reduction treatments. *Forest Ecology  
761 and Management* 211:83–96.
- 762 Baddeley A, Rubak E, Turner R (2015) *Spatial point patterns: Methodology and applications with  
763 R*. London: Chapman and Hall/CRC press, 2015. URL: [http://www.crcpress.com/Spatial-  
764 Point-Patterns-Methodology-and-Applications-with-R/Baddeley-Rubak-  
765 Turner/9781482210200/](http://www.crcpress.com/Spatial-Point-Patterns-Methodology-and-Applications-with-R/Baddeley-Rubak-Turner/9781482210200/)
- 766 Bonello P, Gordon TR, Herms DA, Wood DL, Erbilgin N (2006) Nature and ecological implications  
767 of pathogen-induced systemic resistance in conifers: A novel hypothesis. *Physiological and  
768 Molecular Plant Pathology* 68: 95–104.
- 769 Buchert GP, Rajora OP, Hood JV, Dancik BP (1997) Effects of Harvesting on Genetic Diversity  
770 in Old-Growth Eastern White Pine in Ontario, Canada. *Conservation Biology* 11:747–758.
- 771 Burczyk J, Adams WT, Shimizu JY (1996) Mating patterns and pollen dispersal in a natural  
772 knobcone pine (*Pinus attenuata* Lemmon.) stand. *Heredity* 77:251–260.
- 773 Burczyk J, DiFazio SP, Adams WT (2004) Gene flow in forest trees: how far do genes really  
774 travel? *Forest Genetics* 11:179.
- 775 Cheliak WM, Murray G, Pitel JA (1988) Genetic effects of phenotypic selection in white spruce.  
776 *Forest Ecology and Management* 24:139–149.
- 777 Chung MY, Epperson BK, Chung MG (2003) Genetic structure of age class in *Camellia japonica*  
778 (Theaceae). *Evolution* 57:62–73.
- 779 Cloutier D, Kanashiro M, Ciampi AY, Schoen DJ (2006) Impact of selective logging on inbreeding  
780 and gene dispersal in an Amazonian tree population of *Carapa guianensis* Aubl. *Molecular  
781 Ecology* 16:797–809.
- 782 Collins BM, Everett RG, Stephens SL (2011) Impacts of fire exclusion and recent managed fire  
783 on forest structure in old growth Sierra Nevada mixed-conifer forests. *Ecosphere* 2:1–14.
- 784 Covington WW, Everett RL, Steele R et al. (1994) Historical and anticipated changes in forest  
785 ecosystems of the inland west of the United States. *Journal of Sustainable Forestry* 2:13–  
786 63.

- 787 Dyer (2016) gstudio: Tools related to the spatial analysis of genetic marker data. R package  
788 version 1.5.0. <https://dyerlab.ces.vcu.edu/2015/01/16/gstudio/>
- 789 Echt CS, MayMarquardt P, Hseih M, Zahorchak R (1996) Characterization of microsatellite  
790 markers in eastern white pine. *Genome* 39:1102–1108.
- 791 El-Kassaby YA, Dunsworth BG, Krakowski J (2003) Genetic evaluation of alternative silvicultural  
792 systems in coastal montane forests: western hemlock and amabilis fir. *Theoretical & Applied*  
793 *Genetics* 107:598–610.
- 794 Epperson BK, Alvarez-Buylla ER (1997) Limited seed dispersal and genetic structure in life stages  
795 of *Cecropia obtusifolia*. *Evolution* 51:275–282.
- 796 Fageria MS, Rajora OP (2013a) Effects of harvesting of increasing intensities on genetic diversity  
797 and population structure of white spruce. *Evolutionary Applications* 6:778–794.
- 798 Fageria MS, Rajora OP (2013b) Effects of silvicultural practices on genetic diversity and  
799 population structure of white spruce in Saskatchewan. *Tree Genetics & Genomes* 10:287–  
800 296.
- 801 Farris MA, Mitton JB (1984) Population density, outcrossing rate, and heterozygote superiority in  
802 ponderosa pine. *Evolution* 8:1151–1154.
- 803 Finkeldey R, Ziehe M (2004) Genetic implications of silvicultural regimes. *Forest Ecology and*  
804 *Management* 197:231–244.
- 805 Fowells HA, Schubert GH (1956) Seed crops of forest trees in the pine region of California. USDA  
806 Forest Service, Technical Bulletin 150, Washington, D.C.
- 807 Gömöry D (1992) Effect of stand origin on the genetic diversity of Norway spruce (*Picea abies*  
808 Karst.) populations. *Forest Ecology and Management* 54:215–223.
- 809 Hamrick JL, Godt MJW, Sherman-Broyles SL (1992) Factors influencing levels of genetic diversity  
810 in woody plant species. *New Forests*. 6:95–124.
- 811 Hamrick JL, Murawsky DA, Nason JD (1993) The influence of seed dispersal mechanisms on the  
812 genetic structure of tropical tree populations. *Vegetatio* 107-108:281–297.
- 813 Hansen TF, Pelabon C, Houle D (2011) Heritability is not evolvability. *Evolutionary Biology*  
814 38:258-277
- 815 Hardy OJ, Vekemans X (1998) Isolation by distance in a continuous population: reconciliation  
816 between spatial autocorrelation analysis and population genetics models. *Heredity* 83:145-  
817 154.
- 818 Holsinger KE, Weir BS (2009) Genetics in geographically structured populations: defining,  
819 estimating and interpreting *F*. *Nature Reviews Genetics* 10:639–650.



- 820 Jerome Goudet and Thibaut Jombart (2015). hierfstat: Estimation and Tests of Hierarchical F-  
821 Statistics. R package version 0.04-22. <https://CRAN.R-project.org/package=hierfstat>
- 822 Kärkkäinen K, Savolainen O, Koski V (1999) Why do plants abort so many developing seeds:  
823 bad offspring or bad maternal genotypes? *Evolutionary Ecology* 13:305-317.
- 824 Kramer AT, Ison JL, Ashley MV, Howe HF (2008) The Paradox of Forest Fragmentation Genetics.  
825 *Conservation Biology* 22:878–885.
- 826 Knapp EE, Skinner CN, North MP, Estes BL (2013) Long-term overstory and understory change  
827 following logging and fire exclusion in a Sierra Nevada mixed-conifer forest. *Forest Ecology*  
828 *and Management* 310:903–914.
- 829 Larson AJ, Churchill D (2012) Tree spatial patterns in fire-frequent forests of western North  
830 America, including mechanisms of pattern formation and implications for designing fuel  
831 reduction and restoration treatments. *Forest Ecology and Management* 267:74–92.
- 832 Ledig FT (1988) The conservation of diversity in forest trees: why and how should genes be  
833 conserved? *BioScience* 38:471–479.
- 834 Ledig FT (1992) Human impacts on genetic diversity in forest ecosystems. *Oikos* 63:87–108.
- 835 Lind BM, Menon M, Bolte CE, Faske TM, Eckert AJ (2018) The genomics of local adaptation in  
836 trees: are we out of the woods yet? *Tree Genetics & Genomes* 14:29.
- 837 Lowe AJ, Cavers S, Boshier D, Breed MF, Hollingsworth PM (2015) The resilience of forest  
838 fragmentation genetics - no longer a paradox - we were just looking in the wrong place.  
839 *Heredity* 115:97–99.
- 840 Lynch M, Walsh B (1998) *Genetics and analysis of quantitative traits*. Sinauer Sunderland, MA
- 841 Macdonald SE, Thomas BR, Cherniawsky DM, Purdy BG (2001) Managing genetic resources of  
842 lodgepole pine in west-central Alberta: patterns of isozyme variation in natural populations  
843 and effects of forest management. *Forest Ecology and Management* 152:45–58.
- 844 Marquardt PE, Echt CS, Epperson BK, Pubanz DM (2007) Genetic structure, diversity, and  
845 inbreeding of eastern white pine under different management conditions. *Canadian Journal*  
846 *of Forest Research* 37:2652–2662.
- 847 Millar C, Graumlich LJ, Delany DL, Westfall RD, King JC (2002) Response of high-elevation  
848 conifers. In: *Proceedings of the Eighteenth Annual Pacific Climate Workshop* (p. 57).
- 849 Miller JD, Safford HD, Crimmins M, Thode AE (2009) Quantitative Evidence for Increasing Forest  
850 Fire Severity in the Sierra Nevada and Southern Cascade Mountains, California and Nevada,  
851 USA. *Ecosystems* 12:16–32.

- 852 Moran EV, Clark JS (2011) Estimating seed and pollen movement in a monoecious plant: a  
853 hierarchical Bayesian approach integrating genetic and ecological data. *Molecular Ecology*  
854 20:1248–1262.
- 855 Mouillot D, Graham NAJ, Villéger S, Mason NWH, Bellwood DR (2013) A functional approach  
856 reveals community responses to disturbances. *Trends in Ecology & Evolution* 28:167–177.
- 857 Namroud M-C, Bousquet J, Doerksen T, Beaulieu J (2012) Scanning SNPs from a large set of  
858 expressed genes to assess the impact of artificial selection on the undomesticated genetic  
859 diversity of white spruce. *Evolutionary Applications* 5:641–656.
- 860 Neale DB (1983) Population genetic structure in Douglas-fir shelterwood regeneration system in  
861 southwest Oregon. PhD dissertation. Oregon State University.
- 862 Neale DB, Adams WT (1985) The mating system in natural and shelterwood stands of Douglas-  
863 fir. *Theoretical & Applied Genetics* 71:201–207.
- 864 NIFC (2014) National Interagency Coordination Center Incident Management Situation Report -  
865 October 2014. National Interagency Fire Center, 1–7.
- 866 NIFC (2015) National Interagency Coordination Center Incident Management Situation Report -  
867 September 2015. National Interagency Fire Center, 1–9.
- 868 North MP (2002) The Teakettle Experiment. Proceedings of a Symposium on the Kings River  
869 Sustainable Forest Ecosystems Project: progress and current status: January 26, 1998,  
870 Clovis, California, 47.
- 871 North, M, Collins, B, Safford, H, and Stephenson, N (2016) Montane Forests. Pages 553-578  
872 in H. Mooney and E. Zavelta, (eds.) *Ecosystems of California*, U.C. Press, Berkeley, CA. 984  
873 pp.
- 874 North MP, Hurteau MD, Fiegenger R, Barbour M (2005) Influence of fire and El Nino on tree  
875 recruitment varies by species in Sierran mixed conifer. *Forest Science* 51:187–197.
- 876 North MP, Stephens SL, Collins BM et al. (2015) Reform forest fire management. *Science*  
877 349:1280–1281.
- 878 O’Connell LM, Russell J, Ritland K (2004) Fine-scale estimation of outcrossing in western  
879 redcedar with microsatellite assay of bulked DNA. *Heredity* 93:443–449.
- 880 Oddou-Muratorio S, Demesure-Musch B, Pelissier R (2004) Impacts of gene flow and logging  
881 history on the local genetic structure of a scattered tree species, *Sorbus torminalis* L. Crantz.  
882 *Molecular Ecology* 13(2), 3689–3702.
- 883 Oddou-Muratorio S, Klein EK, Vendramin GG, Fady B (2011) Spatial vs. temporal effects on  
884 demographic and genetic structures: the roles of dispersal, masting and differential mortality  
885 on patterns of recruitment in *Fagus sylvatica*. *Molecular Ecology* 20:1997–2010.

- 886 Pérez F, Granger BE (2007) IPython: A system for interactive scientific computing. *Computing in*  
887 *Science and Engineering* 9: 21-29.
- 888 Perry DJ, Bousquet J (2001) Genetic diversity and mating system of post-fire and post-harvest  
889 black spruce: an investigation using codominant sequence-tagged-site (STS) markers.  
890 *Canadian Journal of Forest Research* 31:32–40.
- 891 Petit RJ, Hampe A (2006) Some evolutionary consequences of being a tree. *Annual Review of*  
892 *Ecology* 37:187–214.
- 893 R Core Team (2017) R: A language and environment for statistical computing. R Foundation for  
894 Statistical Computing, Vienna, Austria. URL <https://www.R-project.org/>.
- 895 Rajora OP, Pluhar SA (2003) Genetic diversity impacts of forest fires, forest harvesting, and  
896 alternative reforestation practices in black spruce (*Picea mariana*). *Theoretical and Applied*  
897 *Genetics* 106:1203–1212.
- 898 Rajora OP, Rahman MH, Buchert GP, Dancik BP (2000) Microsatellite DNA analysis of genetic  
899 effects of harvesting in old-growth eastern white pine (*Pinus strobus*) in Ontario, Canada.  
900 *Molecular Ecology* 9:339–348.
- 901 Ratnam W, Rajora OP, Finkeldey R, Aravanopoulos F, Bouvet J-M, Vaillancourt RE, Kanashiro  
902 M, Fady B, Tomita M, Vinson C (2014) Forest Ecology and Management. *Forest Ecology*  
903 *and Management* 333:52–65.
- 904 Richardson JL, Urban MC, Bolnick DI, Skelly DK (2014) Microgeographic adaptation and the  
905 spatial scale of evolution. *Trends in Ecology & Evolution* 29:165–176.
- 906 Robledo-Amuncio JJ, Alía R, Gil L (2004) Increased selfing and correlated paternity in a small  
907 population of a predominantly outcrossing conifer, *Pinus sylvestris*. *Molecular Ecology*  
908 13:2567–2577.
- 909 Robledo-Amuncio JJ, Gil L (2004) Patterns of pollen dispersal in a small population of *Pinus*  
910 *syvestris* L. revealed by total-exclusion paternity analysis. *Heredity* 94:13–22.
- 911 Safford HD, Schmidt DA, Carlson CH (2009) Effects of fuel treatments on fire severity in an area  
912 of wildland–urban interface, Angora Fire, Lake Tahoe Basin, California. *Forest Ecology and*  
913 *Management* 258:773–787.
- 914 Savolainen O, Pyhäjärvi T, Knürr T (2007) Gene Flow and Local Adaptation in Trees. *Annual*  
915 *Review of Ecology, Evolution, and Systematics* 38:595–619.
- 916 Schwilk DW, Keeley JE, Knapp EE et al. (2009) The National Fire and Fire Surrogate study:  
917 effects of fuel reduction methods on forest vegetation structure and fuels. *Ecological*  
918 *applications* 19:285–304.
- 919 Scotti I, Gugerli F, Pastorelli R, Sebastiani F, Vendramin GG (2008) Maternally and paternally  
920 inherited molecular markers elucidate population patterns and inferred dispersal processes

- 921 on a small scale within a subalpine stand of Norway spruce (*Picea abies* [L.] Karst.). Forest  
922 ecology and management 255:3806-3812.
- 923 Sierra Nevada Forest Plan Amendment – SNFPA (2004) Final Environmental Impact Statement:  
924 vols.1–6. USDA Forest Service, Pacific Southwest Region, Vallejo, CA.
- 925 Sierra Nevada Ecosystem Project - SNEP (1996) Final Report to Congress: vols.1–3. University  
926 of California, Centers for Water and Wildland Resources, Davis, CA.
- 927 Smouse PE, Dyer RJ, Westfall RD, Sork VL (2001) Two-generation analysis of pollen flow across  
928 a landscape. I. Male gamete heterogeneity among females. *Evolution* 55:260–271.
- 929 Smouse PE, Peakall R (1999) Spatial autocorrelation analysis of individual multiallele and  
930 multilocus genetic structure. *Heredity* 82:561–573.
- 931 Sorenson FC (1983) Geographic variation in seedling Douglas-fir (*Pseudotsuga menziesii*) from  
932 the western Siskiyou Mountains of Oregon. *Ecology* 64:696-702.
- 933 Thomas BR, Macdonald SE, Hicks M, Adams DL, Hodgetts RB (1999) Effects of reforestation  
934 methods on genetic diversity of lodgepole pine: an assessment using microsatellite and  
935 randomly amplified polymorphic DNA markers. *Theoretical and Applied Genetics* 98:793–  
936 801.
- 937 Tierney L, Rossini AJ, Li N, Sevcikova H (2016) snow: Simple Network of Workstations. R  
938 package version 0.4-2. <https://CRAN.R-project.org/package=snow>
- 939 USDA Forest Service (2004) Sierra Nevada Forest Plan Amendment. Final Supplemental  
940 Environmental Impact Statement, Record of Decision. Pacific Southwest Region, R5-MB-  
941 046, 1–72.
- 942 USDA Forest Service (2016a) Fiscal Year 2016 Budget Overview. 1–57.
- 943 USDA Forest Service (2016b) Fiscal Year 2016 Budget Justification. 1–553.
- 944 Verner J, McKelvey KS, Noon BR, Gutierrez RJ, Gould Jr., GI, Beck TW (1992) The California  
945 spotted owl: a technical assessment of its current status. General Technical Report PSW-  
946 133. USDA Forest Service, Pacific Southwest Research Station, Albany, CA, 285 pp.
- 947 Weir BC, Cockerham CC (1984) Estimating *F*-statistics for the analysis of population structure.  
948 *Evolution*, 1358-1370.
- 949 Westerling AL (2006) Warming and Earlier Spring Increase Western U.S. Forest Wildfire Activity.  
950 *Science* 313:940–943.
- 951 Wofford AM, Finch K, Bigott A, Willyard A (2014) A Set of Plastid Loci for Use in Multiplex  
952 Fragment Length Genotyping for Intraspecific Variation in *Pinus* (Pinaceae). *Applications in*  
953 *Plant Sciences* 2:1400002.

Lind *et al.* Genetic effects of forest management

- 954 Wright J (1976) Introduction to forest genetics. Academic Press, New York.
- 955 Zald HSJ, Gray AN, North MP, Kern RA (2008) Initial tree regeneration responses to fire and  
956 thinning treatments in a Sierra Nevada mixed-conifer forest, USA. *Forest Ecology and*  
957 *Management* 256:168–179.
